# Supplementary material
Source: publisher figshare collection journal article supplement (https://geolsoc.figshare.com/ndownloader/files/5421713)
Supplement: Supplementary file 1 [file 5421713]

Table DS10. Hole 647A GRA density data (Srivastava, Arthur et al.,1987). Raw data were visually
compared to core photogaphs to remove spurious values from cracks, concretions, and core disturbance.
Then a ~20 cm smoothing function was performed on the cleaned data. Finally, the 20 cm smoothed
values were subtracted from the cleaned data to obtain detrended values.
SRIVISTAVA, S.P., ARTHUR, M.A. et al. (eds) 1987. Proceedings of the Ocean Drilling Program,
Initial Reports, 105, Ocean Drilling Program, College Station, TX.
Core	Type	Section	Interval (cm)	Depth (mbsf)	Density (g/cc)	35 point (~20 cm) smooth of raw GRA density (g/cc)	Detrended smoothed GRA Density
49	R	1	0.6	462.81	0.253
49	R	1	1.2	462.81	0.359
49	R	1	1.8	462.82	1.148
49	R	1	2.4	462.82	1.632
49	R	1	3	462.83	1.687
49	R	1	3.6	462.84	1.412
49	R	1	4.2	462.84	1.229
49	R	1	4.8	462.85	1.656
49	R	1	5.5	462.86	1.779
49	R	1	6.1	462.86	1.699
49	R	1	6.7	462.87	1.722
49	R	1	8.5	462.89	1.462
49	R	1	9.1	462.89	1.602
49	R	1	9.7	462.9	1.694
49	R	1	10.3	462.9	1.748
49	R	1	10.9	462.91	1.722	1.52	0.202
49	R	1	11.5	462.92	1.665	1.561	0.104
49	R	1	12.1	462.92	1.658	1.599	0.059
49	R	1	12.7	462.93	1.685	1.616	0.069
49	R	1	14.5	462.95	1.451	1.611	-0.16
49	R	1	15.1	462.95	1.527	1.597	-0.07
49	R	1	16.4	462.96	1.533	1.604	-0.071
49	R	1	17	462.97	1.555	1.615	-0.06
49	R	1	19.4	462.99	1.632	1.619	0.013
49	R	1	20	463	1.552	1.62	-0.068
49	R	1	21.2	463.01	1.605	1.623	-0.018
49	R	1	21.8	463.02	1.729	1.626	0.103
49	R	1	22.4	463.02	1.705	1.635	0.07
49	R	1	23	463.03	1.409	1.64	-0.231
49	R	1	24.8	463.05	1.502	1.643	-0.141
49	R	1	25.4	463.05	1.525	1.643	-0.118
49	R	1	26	463.06	1.566	1.645	-0.079
49	R	1	26.7	463.07	1.734	1.649	0.085
49	R	1	27.3	463.07	1.709	1.653	0.056
49	R	1	27.9	463.08	1.641	1.655	-0.014
49	R	1	28.5	463.09	1.697	1.664	0.033
49	R	1	29.1	463.09	1.685	1.669	0.016
49	R	1	29.7	463.1	1.738	1.677	0.061
49	R	1	30.3	463.1	1.464	1.682	-0.218
49	R	1	30.9	463.11	1.206	1.686	-0.48
49	R	1	31.5	463.12	1.651	1.694	-0.043
49	R	1	32.1	463.12	1.625	1.7	-0.075
49	R	1	32.7	463.13	1.795	1.701	0.094
49	R	1	33.3	463.13	1.81	1.703	0.107
49	R	1	33.9	463.14	1.794	1.713	0.081
49	R	1	34.5	463.15	1.823	1.72	0.103
49	R	1	35.1	463.15	1.803	1.729	0.074
49	R	1	35.7	463.16	1.761	1.733	0.028
49	R	1	36.3	463.16	1.801	1.73	0.071
49	R	1	37	463.17	1.759	1.726	0.033
49	R	1	37.6	463.18	1.783	1.728	0.055
49	R	1	38.2	463.18	1.794	1.728	0.066
49	R	1	38.8	463.19	1.823	1.729	0.094
49	R	1	39.4	463.19	1.722	1.727	-0.005
49	R	1	40	463.2	1.778	1.733	0.045
49	R	1	40.6	463.21	1.706	1.748	-0.042
49	R	1	41.2	463.21	1.801	1.75	0.051
49	R	1	41.8	463.22	1.729	1.753	-0.024
49	R	1	42.4	463.22	1.774	1.749	0.025
49	R	1	43	463.23	1.83	1.746	0.084
49	R	1	43.6	463.24	1.821	1.744	0.077
49	R	1	44.2	463.24	1.781	1.743	0.038
49	R	1	44.8	463.25	1.777	1.741	0.036
49	R	1	45.4	463.25	1.745	1.741	0.004
49	R	1	46	463.26	1.744	1.738	0.006
49	R	1	46.6	463.27	1.834	1.74	0.094
49	R	1	47.3	463.27	1.713	1.741	-0.028
49	R	1	47.9	463.28	1.628	1.739	-0.111
49	R	1	48.5	463.29	1.588	1.733	-0.145
49	R	1	49.1	463.29	1.695	1.732	-0.037
49	R	1	49.7	463.3	1.69	1.731	-0.041
49	R	1	50.3	463.3	1.724	1.733	-0.009
49	R	1	50.9	463.31	1.667	1.732	-0.065
49	R	1	51.5	463.32	1.693	1.734	-0.041
49	R	1	52.1	463.32	1.716	1.735	-0.019
49	R	1	52.7	463.33	1.732	1.734	-0.002
49	R	1	53.3	463.33	1.721	1.731	-0.01
49	R	1	53.9	463.34	1.647	1.73	-0.083
49	R	1	54.5	463.35	1.698	1.727	-0.029
49	R	1	55.1	463.35	1.736	1.726	0.01
49	R	1	55.7	463.36	1.802	1.728	0.074
49	R	1	56.3	463.36	1.73	1.728	0.002
49	R	1	56.9	463.37	1.741	1.73	0.011
49	R	1	57.6	463.38	1.705	1.736	-0.031
49	R	1	58.2	463.38	1.817	1.744	0.073
49	R	1	58.8	463.39	1.85	1.749	0.101
49	R	1	59.4	463.39	1.697	1.753	-0.056
49	R	1	60	463.4	1.624	1.754	-0.13
49	R	1	60.6	463.41	1.689	1.758	-0.069
49	R	1	61.2	463.41	1.725	1.763	-0.038
49	R	1	61.8	463.42	1.786	1.767	0.019
49	R	1	62.4	463.42	1.765	1.77	-0.005
49	R	1	63	463.43	1.791	1.772	0.019
49	R	1	63.6	463.44	1.837	1.777	0.06
49	R	1	64.2	463.44	1.774	1.78	-0.006
49	R	1	64.8	463.45	1.722	1.783	-0.061
49	R	1	65.4	463.45	1.738	1.781	-0.043
49	R	1	66	463.46	1.685	1.784	-0.099
49	R	1	66.6	463.47	1.705	1.788	-0.083
49	R	1	67.2	463.47	1.81	1.791	0.019
49	R	1	67.8	463.48	1.826	1.793	0.033
49	R	1	68.5	463.49	1.803	1.793	0.01
49	R	1	69.1	463.49	1.841	1.795	0.046
49	R	1	69.7	463.5	1.866	1.801	0.065
49	R	1	70.3	463.5	1.864	1.801	0.063
49	R	1	70.9	463.51	1.832	1.804	0.028
49	R	1	71.5	463.52	1.769	1.805	-0.036
49	R	1	72.1	463.52	1.789	1.804	-0.015
49	R	1	72.7	463.53	1.878	1.806	0.072
49	R	1	73.3	463.53	1.833	1.806	0.027
49	R	1	73.9	463.54	1.859	1.81	0.049
49	R	1	74.5	463.55	1.799	1.815	-0.016
49	R	1	75.1	463.55	1.801	1.817	-0.016
49	R	1	75.7	463.56	1.811	1.819	-0.008
49	R	1	76.3	463.56	1.855	1.822	0.033
49	R	1	76.9	463.57	1.723	1.82	-0.097
49	R	1	77.5	463.58	1.842	1.821	0.021
49	R	1	78.1	463.58	1.852	1.82	0.032
49	R	1	78.8	463.59	1.841	1.816	0.025
49	R	1	79.4	463.59	1.864	1.814	0.05
49	R	1	80	463.6	1.854	1.812	0.042
49	R	1	80.6	463.61	1.756	1.81	-0.054
49	R	1	81.2	463.61	1.846	1.81	0.036
49	R	1	81.8	463.62	1.706	1.807	-0.101
49	R	1	82.4	463.62	1.812	1.806	0.006
49	R	1	83	463.63	1.813	1.807	0.006
49	R	1	83.6	463.64	1.76	1.806	-0.046
49	R	1	84.2	463.64	1.855	1.807	0.048
49	R	1	84.8	463.65	1.833	1.81	0.023
49	R	1	85.4	463.65	1.911	1.812	0.099
49	R	1	86	463.66	1.905	1.81	0.095
49	R	1	86.6	463.67	1.803	1.812	-0.009
49	R	1	87.2	463.67	1.759	1.81	-0.051
49	R	1	87.8	463.68	1.796	1.807	-0.011
49	R	1	88.4	463.68	1.738	1.808	-0.07
49	R	1	89.1	463.69	1.883	1.805	0.078
49	R	1	89.7	463.7	1.736	1.803	-0.067
49	R	1	90.3	463.7	1.73	1.806	-0.076
49	R	1	90.9	463.71	1.781	1.805	-0.024
49	R	1	91.5	463.72	1.781	1.809	-0.028
49	R	1	92.1	463.72	1.764	1.809	-0.045
49	R	1	92.7	463.73	1.764	1.807	-0.043
49	R	1	93.3	463.73	1.717	1.809	-0.092
49	R	1	93.9	463.74	1.832	1.805	0.027
49	R	1	94.5	463.75	1.854	1.8	0.054
49	R	1	95.1	463.75	1.832	1.796	0.036
49	R	1	95.7	463.76	1.842	1.792	0.05
49	R	1	96.3	463.76	1.903	1.79	0.113
49	R	1	96.9	463.77	1.894	1.788	0.106
49	R	1	97.5	463.78	1.764	1.787	-0.023
49	R	1	98.1	463.78	1.791	1.789	0.002
49	R	1	98.7	463.79	1.776	1.786	-0.01
49	R	1	99.4	463.79	1.75	1.786	-0.036
49	R	1	100	463.8	1.874	1.789	0.085
49	R	1	100.6	463.81	1.764	1.791	-0.027
49	R	1	101.2	463.81	1.792	1.791	0.001
49	R	1	101.8	463.82	1.855	1.788	0.067
49	R	1	102.4	463.82	1.799	1.786	0.013
49	R	1	103	463.83	1.855	1.785	0.07
49	R	1	103.6	463.84	1.8	1.779	0.021
49	R	1	104.2	463.84	1.762	1.775	-0.013
49	R	1	104.8	463.85	1.825	1.773	0.052
49	R	1	105.4	463.85	1.701	1.763	-0.062
49	R	1	106	463.86	1.683	1.753	-0.07
49	R	1	106.6	463.87	1.742	1.745	-0.003
49	R	1	107.2	463.87	1.769	1.744	0.025
49	R	1	107.8	463.88	1.745	1.742	0.003
49	R	1	108.4	463.88	1.679	1.741	-0.062
49	R	1	109	463.89	1.771	1.738	0.033
49	R	1	109.6	463.9	1.797	1.733	0.064
49	R	1	110.3	463.9	1.781	1.731	0.05
49	R	1	110.9	463.91	1.734	1.727	0.007
49	R	1	111.5	463.92	1.855	1.721	0.134
49	R	1	112.1	463.92	1.852	1.718	0.134
49	R	1	112.7	463.93	1.761	1.711	0.05
49	R	1	113.3	463.93	1.676	1.707	-0.031
49	R	1	113.9	463.94	1.7	1.706	-0.006
49	R	1	114.5	463.95	1.652	1.702	-0.05
49	R	1	115.1	463.95	1.624	1.702	-0.078
49	R	1	115.7	463.96	1.728	1.702	0.026
49	R	1	116.3	463.96	1.755	1.703	0.052
49	R	1	116.9	463.97	1.505	1.704	-0.199
49	R	1	117.5	463.98	1.53	1.704	-0.174
49	R	1	118.1	463.98	1.623	1.705	-0.082
49	R	1	118.7	463.99	1.738	1.706	0.032
49	R	1	119.3	463.99	1.733	1.707	0.026
49	R	1	119.9	464	1.723	1.709	0.014
49	R	1	120.6	464.01	1.651	1.711	-0.06
49	R	1	121.2	464.01	1.681	1.709	-0.028
49	R	1	121.8	464.02	1.711	1.708	0.003
49	R	1	122.4	464.02	1.665	1.709	-0.044
49	R	1	123	464.03	1.618	1.711	-0.093
49	R	1	123.6	464.04	1.699	1.715	-0.016
49	R	1	124.2	464.04	1.601	1.722	-0.121
49	R	1	124.8	464.05	1.669	1.728	-0.059
49	R	1	125.4	464.05	1.718	1.731	-0.013
49	R	1	126	464.06	1.71	1.734	-0.024
49	R	1	126.6	464.07	1.706	1.743	-0.037
49	R	1	127.2	464.07	1.662	1.751	-0.089
49	R	1	127.8	464.08	1.775	1.758	0.017
49	R	1	128.4	464.08	1.816	1.76	0.056
49	R	1	129	464.09	1.747	1.765	-0.018
49	R	1	129.6	464.1	1.696	1.769	-0.073
49	R	1	130.2	464.1	1.818	1.776	0.042
49	R	1	130.9	464.11	1.833	1.782	0.051
49	R	1	131.5	464.12	1.835	1.788	0.047
49	R	1	132.1	464.12	1.808	1.794	0.014
49	R	1	132.7	464.13	1.802	1.799	0.003
49	R	1	133.3	464.13	1.808	1.799	0.009
49	R	1	133.9	464.14	1.804	1.803	0.001
49	R	1	134.5	464.15	1.729	1.805	-0.076
49	R	1	135.1	464.15	1.862	1.808	0.054
49	R	1	135.7	464.16	1.878	1.811	0.067
49	R	1	136.3	464.16	1.849	1.813	0.036
49	R	1	136.9	464.17	1.825	1.807	0.018
49	R	1	137.5	464.18	1.863	1.806	0.057
49	R	1	138.1	464.18	1.818	1.806	0.012
49	R	1	138.7	464.19	1.8	1.809	-0.009
49	R	1	139.3	464.19	1.887	1.813	0.074
49	R	1	139.9	464.2	1.792	1.815	-0.023
49	R	1	140.5	464.21	1.915	1.814	0.101
49	R	1	141.2	464.21	1.88	1.815	0.065
49	R	1	141.8	464.22	1.889	1.817	0.072
49	R	1	142.4	464.22	1.896	1.818	0.078
49	R	1	143	464.23	1.906	1.818	0.088
49	R	1	143.6	464.24	1.878	1.817	0.061
49	R	1	144.2	464.24	1.797	1.818	-0.021
49	R	1	144.8	464.25	1.689	1.816	-0.127
49	R	1	145.4	464.25	1.747	1.815	-0.068
49	R	1	146	464.26	1.726	1.814	-0.088
49	R	1	146.6	464.27	1.821	1.814	0.007
49	R	1	147.2	464.27	1.811	1.816	-0.005
49	R	1	147.8	464.28	1.786	1.814	-0.028
49	R	1	148.4	464.28	1.445	1.816	-0.371
49	R	2	0.6	464.31	1.746	1.814	-0.068
49	R	2	1.2	464.31	1.837	1.816	0.021
49	R	2	1.8	464.32	1.828	1.814	0.014
49	R	2	2.4	464.32	1.847	1.814	0.033
49	R	2	3	464.33	1.89	1.812	0.078
49	R	2	3.6	464.34	1.812	1.812	0
49	R	2	4.2	464.34	1.849	1.811	0.038
49	R	2	4.8	464.35	1.894	1.812	0.082
49	R	2	5.5	464.36	1.816	1.815	0.001
49	R	2	6.1	464.36	1.811	1.819	-0.008
49	R	2	6.7	464.37	1.783	1.823	-0.04
49	R	2	7.3	464.37	1.77	1.829	-0.059
49	R	2	7.9	464.38	1.773	1.833	-0.06
49	R	2	8.5	464.39	1.844	1.834	0.01
49	R	2	9.1	464.39	1.833	1.838	-0.005
49	R	2	9.7	464.4	1.826	1.852	-0.026
49	R	2	10.3	464.4	1.908	1.853	0.055
49	R	2	10.9	464.41	1.768	1.854	-0.086
49	R	2	11.5	464.42	1.863	1.857	0.006
49	R	2	12.1	464.42	1.807	1.86	-0.053
49	R	2	12.7	464.43	1.866	1.86	0.006
49	R	2	13.3	464.43	1.837	1.863	-0.026
49	R	2	13.9	464.44	1.893	1.864	0.029
49	R	2	14.5	464.45	1.833	1.86	-0.027
49	R	2	15.1	464.45	1.893	1.861	0.032
49	R	2	15.8	464.46	1.866	1.864	0.002
49	R	2	16.4	464.46	1.898	1.867	0.031
49	R	2	17	464.47	1.901	1.872	0.029
49	R	2	17.6	464.48	1.827	1.873	-0.046
49	R	2	18.2	464.48	1.909	1.87	0.039
49	R	2	18.8	464.49	1.934	1.86	0.074
49	R	2	19.4	464.49	1.943	1.845	0.098
49	R	2	20	464.5	1.853	1.838	0.015
49	R	2	20.6	464.51	1.927	1.841	0.086
49	R	2	21.2	464.51	1.928	1.843	0.085
49	R	2	21.8	464.52	1.805	1.845	-0.04
49	R	2	22.4	464.52	1.851	1.844	0.007
49	R	2	23	464.53	1.922	1.847	0.075
49	R	2	23.6	464.54	1.973	1.845	0.128
49	R	2	24.2	464.54	1.901	1.844	0.057
49	R	2	24.8	464.55	1.916	1.841	0.075
49	R	2	25.4	464.55	1.885	1.839	0.046
49	R	2	26	464.56	1.747	1.838	-0.091
49	R	2	26.7	464.57	1.841	1.836	0.005
49	R	2	27.3	464.57	1.917	1.837	0.08
49	R	2	27.9	464.58	1.901	1.834	0.067
49	R	2	28.5	464.59	1.918	1.835	0.083
49	R	2	29.1	464.59	1.808	1.833	-0.025
49	R	2	29.7	464.6	1.753	1.832	-0.079
49	R	2	30.3	464.6	1.494	1.828	-0.334
49	R	2	30.9	464.61	1.292	1.827	-0.535
49	R	2	31.5	464.62	1.676	1.827	-0.151
49	R	2	32.1	464.62	1.871	1.827	0.044
49	R	2	32.7	464.63	1.92	1.825	0.095
49	R	2	33.3	464.63	1.877	1.819	0.058
49	R	2	33.9	464.64	1.841	1.816	0.025
49	R	2	34.5	464.65	1.94	1.813	0.127
49	R	2	35.1	464.65	1.804	1.809	-0.005
49	R	2	35.7	464.66	1.8	1.809	-0.009
49	R	2	36.3	464.66	1.805	1.81	-0.005
49	R	2	37	464.67	1.803	1.806	-0.003
49	R	2	37.6	464.68	1.861	1.801	0.06
49	R	2	38.2	464.68	1.813	1.798	0.015
49	R	2	38.8	464.69	1.866	1.795	0.071
49	R	2	39.4	464.69	1.811	1.796	0.015
49	R	2	40	464.7	1.95	1.805	0.145
49	R	2	40.6	464.71	1.874	1.821	0.053
49	R	2	41.2	464.71	1.82	1.824	-0.004
49	R	2	41.8	464.72	1.812	1.821	-0.009
49	R	2	42.4	464.72	1.874	1.818	0.056
49	R	2	43	464.73	1.81	1.815	-0.005
49	R	2	43.6	464.74	1.853	1.814	0.039
49	R	2	44.2	464.74	1.862	1.811	0.051
49	R	2	44.8	464.75	1.739	1.809	-0.07
49	R	2	45.4	464.75	1.815	1.801	0.014
49	R	2	46	464.76	1.786	1.791	-0.005
49	R	2	46.6	464.77	1.765	1.794	-0.029
49	R	2	47.3	464.77	1.736	1.791	-0.055
49	R	2	47.9	464.78	1.871	1.791	0.08
49	R	2	48.5	464.79	1.773	1.785	-0.012
49	R	2	49.1	464.79	1.733	1.783	-0.05
49	R	2	49.7	464.8	1.811	1.78	0.031
49	R	2	50.3	464.8	1.703	1.778	-0.075
49	R	2	50.9	464.81	1.808	1.778	0.03
49	R	2	51.5	464.82	1.815	1.779	0.036
49	R	2	52.1	464.82	1.838	1.777	0.061
49	R	2	52.7	464.83	1.779	1.775	0.004
49	R	2	53.3	464.83	1.778	1.773	0.005
49	R	2	53.9	464.84	1.801	1.774	0.027
49	R	2	54.5	464.85	1.79	1.778	0.012
49	R	2	55.1	464.85	1.799	1.777	0.022
49	R	2	55.7	464.86	1.813	1.777	0.036
49	R	2	56.3	464.86	1.744	1.775	-0.031
49	R	2	56.9	464.87	1.518	1.776	-0.258
49	R	2	57.6	464.88	1.467	1.775	-0.308
49	R	2	58.2	464.88	1.903	1.778	0.125
49	R	2	58.8	464.89	1.769	1.78	-0.011
49	R	2	59.4	464.89	1.784	1.782	0.002
49	R	2	60	464.9	1.671	1.783	-0.112
49	R	2	60.6	464.91	1.747	1.783	-0.036
49	R	2	61.2	464.91	1.836	1.784	0.052
49	R	2	61.8	464.92	1.809	1.784	0.025
49	R	2	62.4	464.92	1.815	1.786	0.029
49	R	2	63	464.93	1.852	1.789	0.063
49	R	2	63.6	464.94	1.791	1.788	0.003
49	R	2	64.2	464.94	1.766	1.79	-0.024
49	R	2	64.8	464.95	1.754	1.792	-0.038
49	R	2	65.4	464.95	1.912	1.793	0.119
49	R	2	66	464.96	1.866	1.796	0.07
49	R	2	66.6	464.97	1.794	1.804	-0.01
49	R	2	67.2	464.97	1.771	1.809	-0.038
49	R	2	67.8	464.98	1.691	1.798	-0.107
49	R	2	68.5	464.99	1.795	1.79	0.005
49	R	2	69.1	464.99	1.815	1.785	0.03
49	R	2	69.7	465	1.901	1.784	0.117
49	R	2	70.3	465	1.805	1.784	0.021
49	R	2	70.9	465.01	1.882	1.783	0.099
49	R	2	71.5	465.02	1.74	1.782	-0.042
49	R	2	72.1	465.02	1.8	1.782	0.018
49	R	2	72.7	465.03	1.861	1.781	0.08
49	R	2	75.7	465.06	1.821	1.782	0.039
49	R	2	76.3	465.06	1.859	1.784	0.075
49	R	2	76.9	465.07	1.859	1.783	0.076
49	R	2	77.5	465.08	1.795	1.774	0.021
49	R	2	78.1	465.08	1.836	1.771	0.065
49	R	2	78.8	465.09	1.88	1.772	0.108
49	R	2	79.4	465.09	1.852	1.774	0.078
49	R	2	80	465.1	1.85	1.779	0.071
49	R	2	80.6	465.11	1.8	1.781	0.019
49	R	2	81.2	465.11	1.636	1.78	-0.144
49	R	2	81.8	465.12	1.515	1.779	-0.264
49	R	2	82.4	465.12	1.496	1.782	-0.286
49	R	2	83	465.13	1.587	1.782	-0.195
49	R	2	83.6	465.14	1.658	1.786	-0.128
49	R	2	84.2	465.14	1.726	1.788	-0.062
49	R	2	84.8	465.15	1.805	1.789	0.016
49	R	2	85.4	465.15	1.793	1.789	0.004
49	R	2	86	465.16	1.82	1.782	0.038
49	R	2	86.6	465.17	1.802	1.772	0.03
49	R	2	87.2	465.17	1.843	1.764	0.079
49	R	2	87.8	465.18	1.835	1.755	0.08
49	R	2	88.4	465.18	1.701	1.75	-0.049
49	R	2	89.1	465.19	1.601	1.75	-0.149
49	R	2	89.7	465.2	1.771	1.748	0.023
49	R	2	90.3	465.2	1.807	1.745	0.062
49	R	2	90.9	465.21	1.847	1.744	0.103
49	R	2	91.5	465.22	1.857	1.747	0.11
49	R	2	92.1	465.22	1.868	1.752	0.116
49	R	2	92.7	465.23	1.795	1.754	0.041
49	R	2	93.3	465.23	1.874	1.753	0.121
49	R	2	93.9	465.24	1.882	1.748	0.134
49	R	2	94.5	465.25	1.906	1.738	0.168
49	R	2	95.1	465.25	1.864	1.73	0.134
49	R	2	95.7	465.26	1.875	1.725	0.15
49	R	2	96.3	465.26	1.889	1.72	0.169
49	R	2	96.9	465.27	1.817	1.714	0.103
49	R	2	97.5	465.28	1.631	1.709	-0.078
49	R	2	98.1	465.28	1.494	1.703	-0.209
49	R	2	98.7	465.29	1.51	1.689	-0.179
49	R	2	99.4	465.29	1.541	1.676	-0.135
49	R	2	100	465.3	1.709	1.666	0.043
49	R	2	100.6	465.31	1.862	1.654	0.208
49	R	2	101.2	465.31	1.758	1.642	0.116
49	R	2	101.8	465.32	1.698	1.634	0.064
49	R	2	102.4	465.32	1.601	1.626	-0.025
49	R	2	103	465.33	1.638	1.621	0.017
49	R	2	103.6	465.34	1.643	1.614	0.029
49	R	2	104.2	465.34	1.682	1.606	0.076
49	R	2	104.8	465.35	1.601	1.602	-0.001
49	R	2	105.4	465.35	1.556	1.597	-0.041
49	R	2	106	465.36	1.456	1.595	-0.139
49	R	2	107.2	465.37	1.533	1.594	-0.061
49	R	2	107.8	465.38	1.614	1.597	0.017
49	R	2	108.4	465.38	1.63	1.6	0.03
49	R	2	109	465.39	1.656	1.604	0.052
49	R	2	109.6	465.4	1.662	1.61	0.052
49	R	2	110.3	465.4	1.462	1.614	-0.152
49	R	2	110.9	465.41	1.142	1.616	-0.474
49	R	2	111.5	465.42	1.312	1.617	-0.305
49	R	2	112.1	465.42	1.432	1.622	-0.19
49	R	2	112.7	465.43	1.433	1.627	-0.194
49	R	2	114.5	465.45	1.455	1.632	-0.177
49	R	2	115.1	465.45	1.575	1.637	-0.062
49	R	2	115.7	465.46	1.524	1.641	-0.117
49	R	2	116.3	465.46	1.679	1.648	0.031
49	R	2	116.9	465.47	1.633	1.654	-0.021
49	R	2	117.5	465.48	1.648	1.666	-0.018
49	R	2	118.1	465.48	1.721	1.675	0.046
49	R	2	118.7	465.49	1.713	1.683	0.03
49	R	2	119.3	465.49	1.804	1.686	0.118
49	R	2	119.9	465.5	1.772	1.687	0.085
49	R	2	120.6	465.51	1.74	1.683	0.057
49	R	2	121.2	465.51	1.606	1.687	-0.081
49	R	2	121.8	465.52	1.658	1.702	-0.044
49	R	2	122.4	465.52	1.741	1.713	0.028
49	R	2	123	465.53	1.846	1.724	0.122
49	R	2	123.6	465.54	1.935	1.733	0.202
49	R	2	124.2	465.54	1.78	1.743	0.037
49	R	2	124.8	465.55	1.873	1.745	0.128
49	R	2	125.4	465.55	1.804	1.746	0.058
49	R	2	126	465.56	1.806	1.746	0.06
49	R	2	126.6	465.57	1.813	1.749	0.064
49	R	2	127.2	465.57	1.815	1.751	0.064
49	R	2	127.8	465.58	1.861	1.754	0.107
49	R	2	128.4	465.58	1.773	1.756	0.017
49	R	2	129	465.59	1.846	1.757	0.089
49	R	2	129.6	465.6	1.873	1.758	0.115
49	R	2	130.2	465.6	1.88	1.755	0.125
49	R	2	130.9	465.61	1.731	1.75	-0.019
49	R	2	131.5	465.62	1.684	1.746	-0.062
49	R	2	132.1	465.62	1.546	1.741	-0.195
49	R	2	132.7	465.63	1.608	1.738	-0.13
49	R	2	133.3	465.63	1.636	1.733	-0.097
49	R	2	133.9	465.64	1.7	1.731	-0.031
49	R	2	134.5	465.65	1.841	1.729	0.112
49	R	2	135.1	465.65	1.741	1.729	0.012
49	R	2	135.7	465.66	1.815	1.731	0.084
49	R	2	136.3	465.66	1.62	1.724	-0.104
49	R	2	136.9	465.67	1.583	1.725	-0.142
49	R	2	137.5	465.68	1.666	1.725	-0.059
49	R	2	138.1	465.68	1.728	1.725	0.003
49	R	2	138.7	465.69	1.726	1.72	0.006
49	R	2	139.3	465.69	1.813	1.714	0.099
49	R	2	139.9	465.7	1.805	1.708	0.097
49	R	2	140.5	465.71	1.837	1.704	0.133
49	R	2	141.2	465.71	1.817	1.701	0.116
49	R	2	141.8	465.72	1.623	1.702	-0.079
49	R	2	142.4	465.72	1.428	1.7	-0.272
49	R	2	143	465.73	1.505	1.692	-0.187
49	R	2	143.6	465.74	1.581	1.689	-0.108
49	R	2	144.2	465.74	1.753	1.681	0.072
49	R	2	144.8	465.75	1.738	1.671	0.067
49	R	2	145.4	465.75	1.709	1.659	0.05
49	R	2	146	465.76	1.818	1.659	0.159
49	R	2	146.6	465.77	1.787	1.66	0.127
49	R	2	148.4	465.78	1.885	1.656	0.229
49	R	3	0.6	465.81	1.584	1.65	-0.066
49	R	3	1.2	465.81	1.846	1.643	0.203
49	R	3	1.8	465.82	1.832	1.634	0.198
49	R	3	2.4	465.82	1.774	1.623	0.151
49	R	3	3	465.83	1.699	1.615	0.084
49	R	3	3.6	465.84	1.661	1.606	0.055
49	R	3	4.2	465.84	1.653	1.605	0.048
49	R	3	4.8	465.85	1.611	1.611	0
49	R	3	5.5	465.86	1.557	1.613	-0.056
49	R	3	6.1	465.86	1.592	1.612	-0.02
49	R	3	6.7	465.87	1.538	1.612	-0.074
49	R	3	7.3	465.87	1.355	1.609	-0.254
49	R	3	7.9	465.88	1.601	1.607	-0.006
49	R	3	8.5	465.89	1.554	1.6	-0.046
49	R	3	9.1	465.89	1.389	1.592	-0.203
49	R	3	9.7	465.9	1.412	1.58	-0.168
49	R	3	12.1	465.92	1.591	1.582	0.009
49	R	3	12.7	465.93	1.621	1.576	0.045
49	R	3	13.3	465.93	1.52	1.569	-0.049
49	R	3	13.9	465.94	1.54	1.559	-0.019
49	R	3	14.5	465.95	1.484	1.551	-0.067
49	R	3	15.1	465.95	1.488	1.548	-0.06
49	R	3	17.6	465.98	1.418	1.547	-0.129
49	R	3	18.2	465.98	1.547	1.548	-0.001
49	R	3	18.8	465.99	1.507	1.55	-0.043
49	R	3	19.4	465.99	1.603	1.551	0.052
49	R	3	20	466	1.639	1.552	0.087
49	R	3	20.6	466.01	1.569	1.564	0.005
49	R	3	21.2	466.01	1.549	1.567	-0.018
49	R	3	21.8	466.02	1.736	1.568	0.168
49	R	3	22.4	466.02	1.644	1.574	0.07
49	R	3	23	466.03	1.655	1.581	0.074
49	R	3	23.6	466.04	1.564	1.584	-0.02
49	R	3	24.2	466.04	1.494	1.588	-0.094
49	R	3	24.8	466.05	1.472	1.592	-0.12
49	R	3	25.4	466.05	1.67	1.596	0.074
49	R	3	26	466.06	1.605	1.607	-0.002
49	R	3	26.7	466.07	1.618	1.615	0.003
49	R	3	27.3	466.07	1.408	1.628	-0.22
49	R	3	27.9	466.08	1.424	1.637	-0.213
49	R	3	28.5	466.09	1.537	1.644	-0.107
49	R	3	29.1	466.09	1.641	1.645	-0.004
49	R	3	29.7	466.1	1.641	1.645	-0.004
49	R	3	30.3	466.1	1.607	1.65	-0.043
49	R	3	30.9	466.11	1.635	1.659	-0.024
49	R	3	31.5	466.12	1.575	1.66	-0.085
49	R	3	32.1	466.12	1.784	1.662	0.122
49	R	3	32.7	466.13	1.695	1.661	0.034
49	R	3	33.3	466.13	1.584	1.666	-0.082
49	R	3	33.9	466.14	1.613	1.675	-0.062
49	R	3	34.5	466.15	1.648	1.681	-0.033
49	R	3	35.1	466.15	1.689	1.682	0.007
49	R	3	35.7	466.16	1.773	1.681	0.092
49	R	3	36.3	466.16	1.676	1.682	-0.006
49	R	3	37	466.17	1.685	1.69	-0.005
49	R	3	37.6	466.18	1.837	1.701	0.136
49	R	3	38.2	466.18	1.768	1.707	0.061
49	R	3	38.8	466.19	1.885	1.705	0.18
49	R	3	39.4	466.19	1.854	1.704	0.15
49	R	3	40	466.2	1.768	1.705	0.063
49	R	3	40.6	466.21	1.632	1.706	-0.074
49	R	3	41.2	466.21	1.637	1.71	-0.073
49	R	3	41.8	466.22	1.764	1.7	0.064
49	R	3	42.4	466.22	1.832	1.694	0.138
49	R	3	43	466.23	1.774	1.691	0.083
49	R	3	43.6	466.24	1.732	1.687	0.045
49	R	3	44.2	466.24	1.625	1.683	-0.058
49	R	3	44.8	466.25	1.738	1.676	0.062
49	R	3	45.4	466.25	1.793	1.666	0.127
49	R	3	46	466.26	1.701	1.663	0.038
49	R	3	46.6	466.27	1.69	1.661	0.029
49	R	3	47.3	466.27	1.557	1.65	-0.093
49	R	3	47.9	466.28	1.652	1.64	0.012
49	R	3	48.5	466.29	1.707	1.63	0.077
49	R	3	49.1	466.29	1.801	1.622	0.179
49	R	3	49.7	466.3	1.749	1.615	0.134
49	R	3	50.3	466.3	1.566	1.615	-0.049
49	R	3	50.9	466.31	1.619	1.611	0.008
49	R	3	51.5	466.32	1.651	1.605	0.046
49	R	3	52.1	466.32	1.661	1.598	0.063
49	R	3	52.7	466.33	1.711	1.593	0.118
49	R	3	53.3	466.33	1.445	1.584	-0.139
49	R	3	53.9	466.34	1.467	1.582	-0.115
49	R	3	54.5	466.35	1.471	1.58	-0.109
49	R	3	55.1	466.35	1.498	1.576	-0.078
49	R	3	55.7	466.36	1.491	1.572	-0.081
49	R	3	56.3	466.36	1.465	1.564	-0.099
49	R	3	57.6	466.38	1.415	1.562	-0.147
49	R	3	58.2	466.38	1.558	1.555	0.003
49	R	3	58.8	466.39	1.614	1.548	0.066
49	R	3	59.4	466.39	1.455	1.54	-0.085
49	R	3	61.2	466.41	1.432	1.541	-0.109
49	R	3	61.8	466.42	1.526	1.546	-0.02
49	R	3	62.4	466.42	1.557	1.547	0.01
49	R	3	63	466.43	1.554	1.548	0.006
49	R	3	63.6	466.44	1.629	1.551	0.078
49	R	3	64.2	466.44	1.482	1.548	-0.066
49	R	3	64.8	466.45	1.54	1.552	-0.012
49	R	3	65.4	466.45	1.614	1.557	0.057
49	R	3	66	466.46	1.575	1.56	0.015
49	R	3	66.6	466.47	1.428	1.566	-0.138
49	R	3	67.2	466.47	1.554	1.575	-0.021
49	R	3	67.8	466.48	1.676	1.587	0.089
49	R	3	68.5	466.49	1.652	1.601	0.051
49	R	3	69.1	466.49	1.545	1.611	-0.066
49	R	3	69.7	466.5	1.432	1.618	-0.186
49	R	3	70.3	466.5	1.489	1.628	-0.139
49	R	3	70.9	466.51	1.403	1.64	-0.237
49	R	3	71.5	466.52	1.467	1.649	-0.182
49	R	3	72.1	466.52	1.511	1.657	-0.146
49	R	3	72.7	466.53	1.775	1.665	0.11
49	R	3	73.3	466.53	1.752	1.67	0.082
49	R	3	73.9	466.54	1.647	1.682	-0.035
49	R	3	74.5	466.55	1.7	1.69	0.01
49	R	3	75.1	466.55	1.763	1.695	0.068
49	R	3	75.7	466.56	1.608	1.699	-0.091
49	R	3	76.3	466.56	1.59	1.709	-0.119
49	R	3	76.9	466.57	1.619	1.715	-0.096
49	R	3	77.5	466.58	1.586	1.718	-0.132
49	R	3	78.1	466.58	1.696	1.722	-0.026
49	R	3	78.8	466.59	1.83	1.732	0.098
49	R	3	79.4	466.59	1.875	1.743	0.132
49	R	3	80	466.6	1.914	1.749	0.165
49	R	3	80.6	466.61	1.901	1.757	0.144
49	R	3	81.2	466.61	1.862	1.76	0.102
49	R	3	81.8	466.62	1.808	1.763	0.045
49	R	3	82.4	466.62	1.833	1.757	0.076
49	R	3	83	466.63	1.852	1.753	0.099
49	R	3	83.6	466.64	1.83	1.756	0.074
49	R	3	84.2	466.64	1.822	1.754	0.068
49	R	3	84.8	466.65	1.833	1.752	0.081
49	R	3	85.4	466.65	1.903	1.755	0.148
49	R	3	86	466.66	1.791	1.762	0.029
49	R	3	86.6	466.67	1.789	1.767	0.022
49	R	3	87.2	466.67	1.743	1.768	-0.025
49	R	3	87.8	466.68	1.757	1.766	-0.009
49	R	3	88.4	466.68	1.762	1.76	0.002
49	R	3	89.1	466.69	1.786	1.755	0.031
49	R	3	89.7	466.7	1.812	1.748	0.064
49	R	3	90.3	466.7	1.881	1.744	0.137
49	R	3	90.9	466.71	1.816	1.739	0.077
49	R	3	91.5	466.72	1.697	1.737	-0.04
49	R	3	92.1	466.72	1.701	1.74	-0.039
49	R	3	92.7	466.73	1.554	1.742	-0.188
49	R	3	93.3	466.73	1.609	1.741	-0.132
49	R	3	93.9	466.74	1.566	1.741	-0.175
49	R	3	94.5	466.75	1.613	1.741	-0.128
49	R	3	95.1	466.75	1.766	1.74	0.026
49	R	3	95.7	466.76	1.63	1.741	-0.111
49	R	3	96.3	466.76	1.675	1.742	-0.067
49	R	3	96.9	466.77	1.728	1.745	-0.017
49	R	3	97.5	466.78	1.825	1.748	0.077
49	R	3	98.1	466.78	1.785	1.752	0.033
49	R	3	98.7	466.79	1.639	1.753	-0.114
49	R	3	99.4	466.79	1.606	1.751	-0.145
49	R	3	100	466.8	1.643	1.738	-0.095
49	R	3	100.6	466.81	1.69	1.727	-0.037
49	R	3	101.2	466.81	1.684	1.724	-0.04
49	R	3	101.8	466.82	1.754	1.721	0.033
49	R	3	102.4	466.82	1.695	1.724	-0.029
49	R	3	103	466.83	1.738	1.725	0.013
49	R	3	103.6	466.84	1.912	1.729	0.183
49	R	3	104.2	466.84	1.924	1.732	0.192
49	R	3	104.8	466.85	1.803	1.734	0.069
49	R	3	105.4	466.85	1.842	1.737	0.105
49	R	3	106	466.86	1.815	1.742	0.073
49	R	3	106.6	466.87	1.871	1.745	0.126
49	R	3	107.2	466.87	1.82	1.744	0.076
49	R	3	107.8	466.88	1.826	1.745	0.081
49	R	3	108.4	466.88	1.855	1.751	0.104
49	R	3	109	466.89	1.852	1.757	0.095
49	R	3	109.6	466.9	1.891	1.763	0.128
49	R	3	110.3	466.9	1.833	1.765	0.068
49	R	3	110.9	466.91	1.744	1.765	-0.021
49	R	3	111.5	466.92	1.441	1.764	-0.323
49	R	3	113.3	466.93	1.411	1.765	-0.354
49	R	3	113.9	466.94	1.586	1.767	-0.181
49	R	3	114.5	466.95	1.609	1.764	-0.155
49	R	3	115.1	466.95	1.648	1.758	-0.11
49	R	3	115.7	466.96	1.643	1.757	-0.114
49	R	3	116.3	466.96	1.705	1.758	-0.053
49	R	3	116.9	466.97	1.718	1.759	-0.041
49	R	3	117.5	466.98	1.835	1.755	0.08
49	R	3	118.1	466.98	1.743	1.754	-0.011
49	R	3	118.7	466.99	1.848	1.756	0.092
49	R	3	119.3	466.99	1.844	1.756	0.088
49	R	3	119.9	467	1.783	1.755	0.028
49	R	3	120.6	467.01	1.823	1.747	0.076
49	R	3	121.2	467.01	1.849	1.735	0.114
49	R	3	121.8	467.02	1.812	1.729	0.083
49	R	3	122.4	467.02	1.869	1.733	0.136
49	R	3	123	467.03	1.748	1.741	0.007
49	R	3	123.6	467.04	1.672	1.747	-0.075
49	R	3	124.2	467.04	1.723	1.752	-0.029
49	R	3	124.8	467.05	1.741	1.753	-0.012
49	R	3	125.4	467.05	1.823	1.756	0.067
49	R	3	126	467.06	1.792	1.759	0.033
49	R	3	126.6	467.07	1.722	1.762	-0.04
49	R	3	127.2	467.07	1.764	1.761	0.003
49	R	3	127.8	467.08	1.855	1.76	0.095
49	R	3	128.4	467.08	1.853	1.751	0.102
49	R	3	129	467.09	1.758	1.746	0.012
49	R	3	129.6	467.1	1.772	1.744	0.028
49	R	3	130.2	467.1	1.889	1.743	0.146
49	R	3	130.9	467.11	1.857	1.741	0.116
49	R	3	131.5	467.12	1.811	1.742	0.069
49	R	3	132.1	467.12	1.604	1.741	-0.137
49	R	3	132.7	467.13	1.42	1.744	-0.324
49	R	3	133.3	467.13	1.535	1.747	-0.212
49	R	3	133.9	467.14	1.593	1.75	-0.157
49	R	3	134.5	467.15	1.684	1.754	-0.07
49	R	3	135.1	467.15	1.795	1.758	0.037
49	R	3	135.7	467.16	1.802	1.758	0.044
49	R	3	136.3	467.16	1.68	1.759	-0.079
49	R	3	136.9	467.17	1.732	1.758	-0.026
49	R	3	137.5	467.18	1.832	1.747	0.085
49	R	3	138.1	467.18	1.823	1.745	0.078
49	R	3	138.7	467.19	1.779	1.747	0.032
49	R	3	139.3	467.19	1.726	1.749	-0.023
49	R	3	139.9	467.2	1.535	1.75	-0.215
49	R	3	140.5	467.21	1.64	1.751	-0.111
49	R	3	141.2	467.21	1.73	1.751	-0.021
49	R	3	141.8	467.22	1.789	1.757	0.032
49	R	3	142.4	467.22	1.788	1.768	0.02
49	R	3	143	467.23	1.841	1.778	0.063
49	R	3	143.6	467.24	1.817	1.787	0.03
49	R	3	144.2	467.24	1.871	1.793	0.078
49	R	3	144.8	467.25	1.763	1.795	-0.032
49	R	3	145.4	467.25	1.847	1.795	0.052
49	R	3	146	467.26	1.868	1.799	0.069
49	R	3	146.6	467.27	1.957	1.805	0.152
49	R	3	147.2	467.27	1.811	1.804	0.007
49	R	3	147.8	467.28	1.739	1.807	-0.068
49	R	3	148.4	467.28	1.728	1.809	-0.081
49	R	4	0.6	467.31	1.493	1.813	-0.32
49	R	4	1.2	467.31	1.775	1.823	-0.048
49	R	4	1.8	467.32	1.823	1.828	-0.005
49	R	4	2.4	467.32	1.834	1.831	0.003
49	R	4	3	467.33	1.924	1.834	0.09
49	R	4	3.6	467.34	1.898	1.835	0.063
49	R	4	4.2	467.34	1.815	1.833	-0.018
49	R	4	4.8	467.35	1.804	1.829	-0.025
49	R	4	5.5	467.36	1.803	1.821	-0.018
49	R	4	6.1	467.36	1.884	1.82	0.064
49	R	4	6.7	467.37	1.906	1.819	0.087
49	R	4	7.3	467.37	1.908	1.814	0.094
49	R	4	7.9	467.38	1.863	1.81	0.053
49	R	4	8.5	467.39	1.802	1.812	-0.01
49	R	4	9.1	467.39	1.817	1.813	0.004
49	R	4	9.7	467.4	1.926	1.817	0.109
49	R	4	10.3	467.4	1.83	1.823	0.007
49	R	4	10.9	467.41	1.915	1.822	0.093
49	R	4	11.5	467.42	1.83	1.824	0.006
49	R	4	12.1	467.42	1.887	1.824	0.063
49	R	4	12.7	467.43	1.881	1.821	0.06
49	R	4	13.3	467.43	1.822	1.82	0.002
49	R	4	13.9	467.44	1.841	1.821	0.02
49	R	4	14.5	467.45	1.866	1.823	0.043
49	R	4	15.1	467.45	1.828	1.824	0.004
49	R	4	15.8	467.46	1.762	1.823	-0.061
49	R	4	16.4	467.46	1.677	1.822	-0.145
49	R	4	17	467.47	1.605	1.82	-0.215
49	R	4	17.6	467.48	1.716	1.808	-0.092
49	R	4	18.2	467.48	1.815	1.808	0.007
49	R	4	18.8	467.49	1.69	1.81	-0.12
49	R	4	19.4	467.49	1.828	1.808	0.02
49	R	4	20	467.5	1.875	1.809	0.066
49	R	4	20.6	467.51	1.799	1.81	-0.011
49	R	4	21.2	467.51	1.857	1.812	0.045
49	R	4	21.8	467.52	1.689	1.814	-0.125
49	R	4	22.4	467.52	1.74	1.814	-0.074
49	R	4	23	467.53	1.903	1.817	0.086
49	R	4	23.6	467.54	1.847	1.817	0.03
49	R	4	24.2	467.54	1.794	1.813	-0.019
49	R	4	24.8	467.55	1.873	1.813	0.06
49	R	4	25.4	467.55	1.853	1.817	0.036
49	R	4	26	467.56	1.868	1.822	0.046
49	R	4	26.7	467.57	1.849	1.831	0.018
49	R	4	27.3	467.57	1.835	1.835	0
49	R	4	27.9	467.58	1.882	1.837	0.045
49	R	4	28.5	467.59	1.827	1.839	-0.012
49	R	4	29.1	467.59	1.458	1.839	-0.381
49	R	4	29.7	467.6	1.796	1.84	-0.044
49	R	4	30.3	467.6	1.888	1.842	0.046
49	R	4	30.9	467.61	1.838	1.841	-0.003
49	R	4	31.5	467.62	1.898	1.842	0.056
49	R	4	32.1	467.62	1.93	1.837	0.093
49	R	4	32.7	467.63	1.888	1.83	0.058
49	R	4	33.3	467.63	1.988	1.828	0.16
49	R	4	33.9	467.64	1.858	1.827	0.031
49	R	4	34.5	467.65	1.921	1.826	0.095
49	R	4	35.1	467.65	1.864	1.825	0.039
49	R	4	35.7	467.66	1.718	1.825	-0.107
49	R	4	36.3	467.66	1.828	1.826	0.002
49	R	4	37	467.67	1.891	1.825	0.066
49	R	4	37.6	467.68	1.855	1.822	0.033
49	R	4	38.2	467.68	1.909	1.822	0.087
49	R	4	38.8	467.69	1.886	1.831	0.055
49	R	4	39.4	467.69	1.878	1.835	0.043
49	R	4	40	467.7	1.768	1.834	-0.066
49	R	4	40.6	467.71	1.83	1.835	-0.005
49	R	4	41.2	467.71	1.888	1.832	0.056
49	R	4	41.8	467.72	1.864	1.828	0.036
49	R	4	42.4	467.72	1.817	1.826	-0.009
49	R	4	43	467.73	1.738	1.817	-0.079
49	R	4	43.6	467.74	1.576	1.818	-0.242
49	R	4	44.2	467.74	1.647	1.82	-0.173
49	R	4	44.8	467.75	1.772	1.823	-0.051
49	R	4	45.4	467.75	1.783	1.827	-0.044
49	R	4	46	467.76	1.813	1.827	-0.014
49	R	4	46.6	467.77	1.831	1.828	0.003
49	R	4	47.3	467.77	1.855	1.829	0.026
49	R	4	47.9	467.78	1.894	1.828	0.066
49	R	4	48.5	467.79	1.781	1.828	-0.047
49	R	4	49.1	467.79	1.786	1.828	-0.042
49	R	4	49.7	467.8	1.833	1.831	0.002
49	R	4	50.3	467.8	1.792	1.827	-0.035
49	R	4	50.9	467.81	1.93	1.826	0.104
49	R	4	51.5	467.82	1.849	1.828	0.021
49	R	4	52.1	467.82	1.871	1.83	0.041
49	R	4	52.7	467.83	1.771	1.835	-0.064
49	R	4	53.3	467.83	1.799	1.846	-0.047
49	R	4	53.9	467.84	1.813	1.853	-0.04
49	R	4	54.5	467.85	1.671	1.857	-0.186
49	R	4	55.1	467.85	1.901	1.861	0.04
49	R	4	55.7	467.86	1.997	1.865	0.132
49	R	4	56.3	467.86	1.96	1.863	0.097
49	R	4	56.9	467.87	1.873	1.856	0.017
49	R	4	57.6	467.88	1.837	1.854	-0.017
49	R	4	58.2	467.88	1.905	1.856	0.049
49	R	4	58.8	467.89	1.901	1.859	0.042
49	R	4	59.4	467.89	1.874	1.86	0.014
49	R	4	60	467.9	1.896	1.862	0.034
49	R	4	60.6	467.91	1.877	1.863	0.014
49	R	4	61.2	467.91	1.852	1.864	-0.012
49	R	4	61.8	467.92	1.712	1.863	-0.151
49	R	4	62.4	467.92	1.83	1.863	-0.033
49	R	4	63	467.93	1.929	1.864	0.065
49	R	4	63.6	467.94	1.896	1.866	0.03
49	R	4	64.2	467.94	1.928	1.874	0.054
49	R	4	64.8	467.95	1.935	1.873	0.062
49	R	4	65.4	467.95	1.896	1.869	0.027
49	R	4	66	467.96	1.922	1.866	0.056
49	R	4	66.6	467.97	1.933	1.865	0.068
49	R	4	67.2	467.97	1.947	1.863	0.084
49	R	4	67.8	467.98	1.745	1.86	-0.115
49	R	4	68.5	467.99	1.641	1.858	-0.217
49	R	4	69.1	467.99	1.804	1.857	-0.053
49	R	4	69.7	468	1.838	1.855	-0.017
49	R	4	70.3	468	1.903	1.854	0.049
49	R	4	70.9	468.01	1.889	1.85	0.039
49	R	4	71.5	468.02	1.862	1.855	0.007
49	R	4	72.1	468.02	1.934	1.856	0.078
49	R	4	72.7	468.03	1.911	1.854	0.057
49	R	4	73.3	468.03	1.831	1.853	-0.022
49	R	4	73.9	468.04	1.779	1.852	-0.073
49	R	4	74.5	468.05	1.825	1.85	-0.025
49	R	4	75.1	468.05	1.89	1.849	0.041
49	R	4	75.7	468.06	1.926	1.85	0.076
49	R	4	76.3	468.06	1.893	1.848	0.045
49	R	4	78.1	468.08	1.857	1.845	0.012
49	R	4	78.8	468.09	1.849	1.848	0.001
49	R	4	79.4	468.09	1.828	1.852	-0.024
49	R	4	80	468.1	1.783	1.853	-0.07
49	R	4	80.6	468.11	1.768	1.854	-0.086
49	R	4	81.2	468.11	1.858	1.852	0.006
49	R	4	81.8	468.12	1.843	1.854	-0.011
49	R	4	82.4	468.12	1.802	1.854	-0.052
49	R	4	83	468.13	1.852	1.853	-0.001
49	R	4	83.6	468.14	1.711	1.854	-0.143
49	R	4	84.2	468.14	1.878	1.854	0.024
49	R	4	84.8	468.15	1.887	1.855	0.032
49	R	4	85.4	468.15	1.833	1.857	-0.024
49	R	4	86	468.16	1.879	1.852	0.027
49	R	4	86.6	468.17	1.893	1.848	0.045
49	R	4	87.2	468.17	1.85	1.849	0.001
49	R	4	87.8	468.18	1.866	1.849	0.017
49	R	4	88.4	468.18	1.953	1.847	0.106
49	R	4	89.1	468.19	1.877	1.844	0.033
49	R	4	89.7	468.2	1.832	1.847	-0.015
49	R	4	90.3	468.2	1.858	1.849	0.009
49	R	4	90.9	468.21	1.762	1.849	-0.087
49	R	4	91.5	468.22	1.868	1.848	0.02
49	R	4	92.1	468.22	1.858	1.848	0.01
49	R	4	92.7	468.23	1.826	1.85	-0.024
49	R	4	93.3	468.23	1.961	1.854	0.107
49	R	4	93.9	468.24	1.885	1.854	0.031
49	R	4	94.5	468.25	1.9	1.856	0.044
49	R	4	95.1	468.25	1.919	1.857	0.062
49	R	4	95.7	468.26	1.838	1.857	-0.019
49	R	4	96.3	468.26	1.833	1.857	-0.024
49	R	4	96.9	468.27	1.881	1.858	0.023
49	R	4	97.5	468.28	1.697	1.855	-0.158
49	R	4	98.1	468.28	1.799	1.852	-0.053
49	R	4	98.7	468.29	1.935	1.853	0.082
49	R	4	99.4	468.29	1.866	1.855	0.011
49	R	4	100	468.3	1.763	1.85	-0.087
49	R	4	100.6	468.31	1.737	1.843	-0.106
49	R	4	101.2	468.31	1.866	1.838	0.028
49	R	4	101.8	468.32	1.857	1.838	0.019
49	R	4	102.4	468.32	1.84	1.843	-0.003
49	R	4	103	468.33	1.812	1.84	-0.028
49	R	4	103.6	468.34	1.799	1.84	-0.041
49	R	4	104.2	468.34	1.917	1.836	0.081
49	R	4	104.8	468.35	1.851	1.835	0.016
49	R	4	105.4	468.35	1.881	1.831	0.05
49	R	4	106	468.36	1.977	1.828	0.149
49	R	4	106.6	468.37	1.858	1.828	0.03
49	R	4	107.2	468.37	1.863	1.835	0.028
49	R	4	107.8	468.38	1.901	1.836	0.065
49	R	4	108.4	468.38	1.885	1.836	0.049
49	R	4	109	468.39	1.776	1.839	-0.063
49	R	4	109.6	468.4	1.847	1.843	0.004
49	R	4	110.3	468.4	1.918	1.847	0.071
49	R	4	110.9	468.41	1.886	1.848	0.038
49	R	4	111.5	468.42	1.684	1.847	-0.163
49	R	4	112.1	468.42	1.504	1.845	-0.341
49	R	4	112.7	468.43	1.717	1.846	-0.129
49	R	4	113.3	468.43	1.854	1.847	0.007
49	R	4	113.9	468.44	1.981	1.845	0.136
49	R	4	114.5	468.45	1.875	1.843	0.032
49	R	4	115.1	468.45	1.879	1.839	0.04
49	R	4	115.7	468.46	1.754	1.831	-0.077
49	R	4	116.3	468.46	1.887	1.826	0.061
49	R	4	116.9	468.47	1.707	1.829	-0.122
49	R	4	117.5	468.48	1.711	1.828	-0.117
49	R	4	118.1	468.48	1.903	1.825	0.078
49	R	4	118.7	468.49	1.926	1.826	0.1
49	R	4	119.3	468.49	1.851	1.821	0.03
49	R	4	119.9	468.5	1.943	1.818	0.125
49	R	4	120.6	468.51	1.962	1.815	0.147
49	R	4	121.2	468.51	1.89	1.819	0.071
49	R	4	121.8	468.52	1.889	1.826	0.063
49	R	4	122.4	468.52	1.884	1.823	0.061
49	R	4	123	468.53	1.847	1.817	0.03
49	R	4	123.6	468.54	1.765	1.811	-0.046
49	R	4	124.2	468.54	1.855	1.81	0.045
49	R	4	124.8	468.55	1.83	1.81	0.02
49	R	4	125.4	468.55	1.833	1.815	0.018
49	R	4	126	468.56	1.797	1.816	-0.019
49	R	4	126.6	468.57	1.726	1.819	-0.093
49	R	4	127.2	468.57	1.684	1.823	-0.139
49	R	4	127.8	468.58	1.689	1.821	-0.132
49	R	4	128.4	468.58	1.991	1.818	0.173
49	R	4	129.6	468.6	1.848	1.818	0.03
49	R	4	130.2	468.6	1.797	1.81	-0.013
49	R	4	130.9	468.61	1.801	1.801	0
49	R	4	131.5	468.62	1.67	1.792	-0.122
49	R	4	133.3	468.63	1.797	1.782	0.015
49	R	4	133.9	468.64	1.81	1.777	0.033
49	R	4	134.5	468.65	1.811	1.773	0.038
49	R	4	135.1	468.65	1.748	1.773	-0.025
49	R	4	135.7	468.66	1.602	1.771	-0.169
49	R	4	136.3	468.66	1.643	1.771	-0.128
49	R	4	136.9	468.67	1.795	1.767	0.028
49	R	4	137.5	468.68	1.832	1.77	0.062
49	R	4	138.1	468.68	1.872	1.77	0.102
49	R	4	138.7	468.69	1.93	1.773	0.157
49	R	4	139.3	468.69	1.913	1.775	0.138
49	R	4	139.9	468.7	1.808	1.77	0.038
49	R	4	140.5	468.71	1.854	1.768	0.086
49	R	4	141.2	468.71	1.849	1.768	0.081
49	R	4	141.8	468.72	1.805	1.767	0.038
49	R	4	142.4	468.72	1.844	1.767	0.077
49	R	4	143	468.73	1.689	1.765	-0.076
49	R	4	143.6	468.74	1.622	1.762	-0.14
49	R	4	144.2	468.74	1.589	1.761	-0.172
49	R	4	144.8	468.75	1.553	1.76	-0.207
49	R	4	145.4	468.75	1.71	1.764	-0.054
49	R	4	146	468.76	1.685	1.767	-0.082
49	R	4	146.6	468.77	1.769	1.764	0.005
49	R	4	147.2	468.77	1.783	1.76	0.023
49	R	4	147.8	468.78	1.841	1.756	0.085
49	R	5	1.2	468.81	1.698	1.752	-0.054
49	R	5	1.8	468.82	1.877	1.748	0.129
49	R	5	2.4	468.82	1.755	1.746	0.009
49	R	5	3	468.83	1.759	1.746	0.013
49	R	5	3.6	468.84	1.761	1.744	0.017
49	R	5	4.2	468.84	1.833	1.743	0.09
49	R	5	4.8	468.85	1.765	1.741	0.024
49	R	5	5.5	468.86	1.799	1.745	0.054
49	R	5	6.1	468.86	1.763	1.751	0.012
49	R	5	6.7	468.87	1.68	1.759	-0.079
49	R	5	7.3	468.87	1.726	1.767	-0.041
49	R	5	7.9	468.88	1.714	1.769	-0.055
49	R	5	8.5	468.89	1.753	1.772	-0.019
49	R	5	9.1	468.89	1.739	1.774	-0.035
49	R	5	9.7	468.9	1.725	1.774	-0.049
49	R	5	10.3	468.9	1.738	1.766	-0.028
49	R	5	10.9	468.91	1.705	1.76	-0.055
49	R	5	11.5	468.92	1.697	1.754	-0.057
49	R	5	12.1	468.92	1.712	1.756	-0.044
49	R	5	12.7	468.93	1.821	1.757	0.064
49	R	5	13.3	468.93	1.748	1.761	-0.013
49	R	5	13.9	468.94	1.76	1.759	0.001
49	R	5	14.5	468.95	1.838	1.762	0.076
49	R	5	15.1	468.95	1.791	1.763	0.028
49	R	5	15.8	468.96	1.756	1.763	-0.007
49	R	5	16.4	468.96	1.783	1.759	0.024
49	R	5	17	468.97	1.833	1.759	0.074
49	R	5	17.6	468.98	1.838	1.761	0.077
49	R	5	18.2	468.98	1.841	1.762	0.079
49	R	5	18.8	468.99	1.834	1.764	0.07
49	R	5	19.4	468.99	1.788	1.767	0.021
49	R	5	20	469	1.785	1.771	0.014
49	R	5	20.6	469.01	1.856	1.774	0.082
49	R	5	21.2	469.01	1.772	1.774	-0.002
49	R	5	21.8	469.02	1.557	1.777	-0.22
49	R	5	22.4	469.02	1.489	1.777	-0.288
49	R	5	23	469.03	1.692	1.78	-0.088
49	R	5	23.6	469.04	1.82	1.785	0.035
49	R	5	24.2	469.04	1.791	1.786	0.005
49	R	5	24.8	469.05	1.883	1.787	0.096
49	R	5	25.4	469.05	1.79	1.791	-0.001
49	R	5	26	469.06	1.841	1.793	0.048
49	R	5	26.7	469.07	1.857	1.796	0.061
49	R	5	27.3	469.07	1.749	1.799	-0.05
49	R	5	27.9	469.08	1.556	1.8	-0.244
49	R	5	28.5	469.09	1.698	1.802	-0.104
49	R	5	29.1	469.09	1.795	1.805	-0.01
49	R	5	29.7	469.1	1.805	1.81	-0.005
49	R	5	30.3	469.1	1.8	1.811	-0.011
49	R	5	30.9	469.11	1.82	1.813	0.007
49	R	5	31.5	469.12	1.9	1.821	0.079
49	R	5	32.1	469.12	1.784	1.832	-0.048
49	R	5	32.7	469.13	1.713	1.837	-0.124
49	R	5	33.3	469.13	1.812	1.84	-0.028
49	R	5	33.9	469.14	1.804	1.842	-0.038
49	R	5	34.5	469.15	1.884	1.842	0.042
49	R	5	35.1	469.15	1.918	1.844	0.074
49	R	5	35.7	469.16	1.877	1.845	0.032
49	R	5	36.3	469.16	1.828	1.845	-0.017
49	R	5	37	469.17	1.906	1.85	0.056
49	R	5	37.6	469.18	1.853	1.861	-0.008
49	R	5	38.2	469.18	1.931	1.868	0.063
49	R	5	38.8	469.19	1.935	1.871	0.064
49	R	5	39.4	469.19	1.861	1.87	-0.009
49	R	5	40	469.2	1.916	1.874	0.042
49	R	5	41.2	469.21	1.897	1.875	0.022
49	R	5	41.8	469.22	1.96	1.874	0.086
49	R	5	42.4	469.22	1.894	1.878	0.016
49	R	5	43	469.23	1.842	1.885	-0.043
49	R	5	43.6	469.24	1.837	1.888	-0.051
49	R	5	44.2	469.24	1.861	1.891	-0.03
49	R	5	44.8	469.25	1.889	1.89	-0.001
49	R	5	45.4	469.25	1.896	1.885	0.011
49	R	5	46	469.26	1.89	1.883	0.007
49	R	5	46.6	469.27	1.868	1.886	-0.018
49	R	5	47.3	469.27	1.848	1.886	-0.038
49	R	5	47.9	469.28	1.885	1.886	-0.001
49	R	5	48.5	469.29	1.849	1.883	-0.034
49	R	5	49.1	469.29	1.928	1.877	0.051
49	R	5	49.7	469.3	1.94	1.872	0.068
49	R	5	50.3	469.3	1.942	1.865	0.077
49	R	5	50.9	469.31	1.905	1.862	0.043
49	R	5	51.5	469.32	1.776	1.853	-0.077
49	R	5	52.1	469.32	1.941	1.844	0.097
49	R	5	52.7	469.33	1.861	1.832	0.029
49	R	5	53.3	469.33	1.866	1.825	0.041
49	R	5	53.9	469.34	1.901	1.823	0.078
49	R	5	54.5	469.35	1.982	1.82	0.162
49	R	5	55.1	469.35	1.893	1.816	0.077
49	R	5	55.7	469.36	1.922	1.811	0.111
49	R	5	56.3	469.36	1.84	1.807	0.033
49	R	5	56.9	469.37	1.743	1.801	-0.058
49	R	5	57.6	469.38	1.825	1.797	0.028
49	R	5	58.2	469.38	1.916	1.796	0.12
49	R	5	58.8	469.39	1.924	1.794	0.13
49	R	5	59.4	469.39	1.841	1.789	0.052
49	R	5	60	469.4	1.826	1.787	0.039
49	R	5	60.6	469.41	1.73	1.786	-0.056
49	R	5	61.2	469.41	1.697	1.789	-0.092
49	R	5	61.8	469.42	1.671	1.783	-0.112
49	R	5	62.4	469.42	1.77	1.78	-0.01
49	R	5	63	469.43	1.665	1.776	-0.111
49	R	5	63.6	469.44	1.567	1.771	-0.204
49	R	5	64.8	469.45	1.418	1.764	-0.346
49	R	5	65.4	469.45	1.604	1.76	-0.156
49	R	5	66	469.46	1.781	1.758	0.023
49	R	5	66.6	469.47	1.783	1.757	0.026
49	R	5	67.2	469.47	1.759	1.761	-0.002
49	R	5	67.8	469.48	1.723	1.763	-0.04
49	R	5	68.5	469.49	1.714	1.762	-0.048
49	R	5	69.1	469.49	1.64	1.764	-0.124
49	R	5	69.7	469.5	1.761	1.768	-0.007
49	R	5	70.3	469.5	1.817	1.771	0.046
49	R	5	70.9	469.51	1.847	1.777	0.07
49	R	5	71.5	469.52	1.779	1.785	-0.006
49	R	5	72.1	469.52	1.87	1.793	0.077
49	R	5	72.7	469.53	1.85	1.797	0.053
49	R	5	73.3	469.53	1.877	1.802	0.075
49	R	5	73.9	469.54	1.733	1.811	-0.078
49	R	5	74.5	469.55	1.758	1.822	-0.064
49	R	5	75.1	469.55	1.728	1.828	-0.1
49	R	5	75.7	469.56	1.738	1.83	-0.092
49	R	5	76.3	469.56	1.733	1.833	-0.1
49	R	5	76.9	469.57	1.762	1.835	-0.073
49	R	5	77.5	469.58	1.83	1.838	-0.008
49	R	5	78.1	469.58	1.799	1.841	-0.042
49	R	5	78.8	469.59	1.89	1.846	0.044
49	R	5	79.4	469.59	1.914	1.847	0.067
49	R	5	80	469.6	1.882	1.848	0.034
49	R	5	80.6	469.61	1.967	1.846	0.121
49	R	5	81.2	469.61	1.999	1.85	0.149
49	R	5	81.8	469.62	1.928	1.852	0.076
49	R	5	82.4	469.62	1.928	1.85	0.078
49	R	5	83	469.63	1.977	1.848	0.129
49	R	5	83.6	469.64	1.956	1.849	0.107
49	R	5	84.2	469.64	1.903	1.852	0.051
49	R	5	84.8	469.65	1.866	1.857	0.009
49	R	5	85.4	469.65	1.869	1.862	0.007
49	R	5	86	469.66	1.792	1.869	-0.077
49	R	5	86.6	469.67	1.828	1.873	-0.045
49	R	5	87.2	469.67	1.85	1.876	-0.026
49	R	5	87.8	469.68	1.88	1.879	0.001
49	R	5	88.4	469.68	1.841	1.879	-0.038
49	R	5	89.1	469.69	1.827	1.881	-0.054
49	R	5	89.7	469.7	1.813	1.881	-0.068
49	R	5	90.3	469.7	1.828	1.872	-0.044
49	R	5	90.9	469.71	1.783	1.863	-0.08
49	R	5	91.5	469.72	1.844	1.858	-0.014
49	R	5	92.1	469.72	1.802	1.853	-0.051
49	R	5	92.7	469.73	1.913	1.848	0.065
49	R	5	93.3	469.73	1.926	1.841	0.085
49	R	5	93.9	469.74	1.779	1.838	-0.059
49	R	5	94.5	469.75	1.812	1.834	-0.022
49	R	5	95.1	469.75	1.772	1.829	-0.057
49	R	5	95.7	469.76	1.868	1.828	0.04
49	R	5	96.3	469.76	1.896	1.826	0.07
49	R	5	96.9	469.77	1.929	1.827	0.102
49	R	5	97.5	469.78	1.948	1.826	0.122
49	R	5	98.1	469.78	1.917	1.826	0.091
49	R	5	98.7	469.79	1.925	1.826	0.099
49	R	5	100	469.8	1.921	1.828	0.093
49	R	5	100.6	469.81	1.896	1.828	0.068
49	R	5	101.2	469.81	1.969	1.832	0.137
49	R	5	101.8	469.82	1.878	1.834	0.044
49	R	5	102.4	469.82	1.658	1.835	-0.177
49	R	5	103	469.83	1.679	1.834	-0.155
49	R	5	103.6	469.84	1.756	1.827	-0.071
49	R	5	104.2	469.84	1.743	1.826	-0.083
49	R	5	104.8	469.85	1.802	1.823	-0.021
49	R	5	105.4	469.85	1.736	1.822	-0.086
49	R	5	106	469.86	1.771	1.821	-0.05
49	R	5	106.6	469.87	1.737	1.818	-0.081
49	R	5	107.2	469.87	1.711	1.817	-0.106
49	R	5	107.8	469.88	1.752	1.814	-0.062
49	R	5	108.4	469.88	1.744	1.813	-0.069
49	R	5	109	469.89	1.903	1.812	0.091
49	R	5	109.6	469.9	1.823	1.81	0.013
49	R	5	110.3	469.9	1.84	1.808	0.032
49	R	5	110.9	469.91	1.853	1.803	0.05
49	R	5	111.5	469.92	1.871	1.799	0.072
49	R	5	112.1	469.92	1.823	1.8	0.023
49	R	5	112.7	469.93	1.928	1.801	0.127
49	R	5	113.3	469.93	1.896	1.802	0.094
49	R	5	113.9	469.94	1.863	1.804	0.059
49	R	5	114.5	469.95	1.857	1.805	0.052
49	R	5	115.1	469.95	1.689	1.809	-0.12
49	R	5	115.7	469.96	1.73	1.81	-0.08
49	R	5	116.3	469.96	1.716	1.812	-0.096
49	R	5	116.9	469.97	1.753	1.816	-0.063
49	R	5	117.5	469.98	1.809	1.816	-0.007
49	R	5	118.1	469.98	1.817	1.817	0
49	R	5	118.7	469.99	1.875	1.815	0.06
49	R	5	119.3	469.99	1.857	1.813	0.044
49	R	5	119.9	470	1.868	1.808	0.06
49	R	5	120.6	470.01	1.884	1.806	0.078
49	R	5	121.2	470.01	1.868	1.806	0.062
49	R	5	121.8	470.02	1.817	1.804	0.013
49	R	5	122.4	470.02	1.79	1.801	-0.011
49	R	5	123	470.03	1.748	1.798	-0.05
49	R	5	123.6	470.04	1.697	1.797	-0.1
49	R	5	124.2	470.04	1.695	1.797	-0.102
49	R	5	124.8	470.05	1.79	1.799	-0.009
49	R	5	125.4	470.05	1.838	1.799	0.039
49	R	5	126	470.06	1.82	1.798	0.022
49	R	5	126.6	470.07	1.882	1.797	0.085
49	R	5	127.2	470.07	1.817	1.795	0.022
49	R	5	127.8	470.08	1.789	1.794	-0.005
49	R	5	128.4	470.08	1.869	1.79	0.079
49	R	5	129	470.09	1.754	1.788	-0.034
49	R	5	129.6	470.1	1.764	1.784	-0.02
49	R	5	130.2	470.1	1.85	1.783	0.067
49	R	5	130.9	470.11	1.729	1.78	-0.051
49	R	5	131.5	470.12	1.67	1.78	-0.11
49	R	5	132.1	470.12	1.793	1.782	0.011
49	R	5	132.7	470.13	1.855	1.783	0.072
49	R	5	133.3	470.13	1.768	1.786	-0.018
49	R	5	133.9	470.14	1.834	1.789	0.045
49	R	5	134.5	470.15	1.785	1.79	-0.005
49	R	5	135.1	470.15	1.82	1.787	0.033
49	R	5	135.7	470.16	1.866	1.782	0.084
49	R	5	136.3	470.16	1.764	1.779	-0.015
49	R	5	136.9	470.17	1.718	1.779	-0.061
49	R	5	138.1	470.18	1.667	1.78	-0.113
49	R	5	138.7	470.19	1.729	1.778	-0.049
49	R	5	139.3	470.19	1.754	1.78	-0.026
49	R	5	139.9	470.2	1.75	1.78	-0.03
49	R	5	140.5	470.21	1.766	1.78	-0.014
49	R	5	141.2	470.21	1.755	1.782	-0.027
49	R	5	141.8	470.22	1.75	1.785	-0.035
49	R	5	142.4	470.22	1.849	1.785	0.064
49	R	5	143	470.23	1.755	1.781	-0.026
49	R	5	143.6	470.24	1.828	1.782	0.046
49	R	5	144.2	470.24	1.835	1.781	0.054
49	R	5	144.8	470.25	1.813	1.78	0.033
49	R	5	145.4	470.25	1.802	1.778	0.024
49	R	5	146	470.26	1.78	1.778	0.002
49	R	5	146.6	470.27	1.839	1.779	0.06
49	R	5	147.2	470.27	1.74	1.779	-0.039
49	R	6	0.6	470.31	1.62	1.781	-0.161
49	R	6	1.2	470.31	1.778	1.782	-0.004
49	R	6	1.8	470.32	1.832	1.782	0.05
49	R	6	2.4	470.32	1.826	1.783	0.043
49	R	6	3	470.33	1.804	1.784	0.02
49	R	6	3.6	470.34	1.803	1.784	0.019
49	R	6	4.2	470.34	1.757	1.785	-0.028
49	R	6	4.8	470.35	1.869	1.784	0.085
49	R	6	5.5	470.36	1.791	1.785	0.006
49	R	6	6.1	470.36	1.784	1.782	0.002
49	R	6	6.7	470.37	1.802	1.779	0.023
49	R	6	7.3	470.37	1.718	1.777	-0.059
49	R	6	7.9	470.38	1.791	1.774	0.017
49	R	6	8.5	470.39	1.778	1.772	0.006
49	R	6	9.1	470.39	1.783	1.769	0.014
49	R	6	9.7	470.4	1.748	1.769	-0.021
49	R	6	10.3	470.4	1.847	1.774	0.073
49	R	6	10.9	470.41	1.802	1.774	0.028
49	R	6	11.5	470.42	1.732	1.771	-0.039
49	R	6	12.1	470.42	1.724	1.769	-0.045
49	R	6	12.7	470.43	1.752	1.77	-0.018
49	R	6	13.3	470.43	1.783	1.769	0.014
49	R	6	13.9	470.44	1.766	1.771	-0.005
49	R	6	14.5	470.45	1.816	1.766	0.05
49	R	6	15.1	470.45	1.74	1.766	-0.026
49	R	6	15.8	470.46	1.792	1.764	0.028
49	R	6	16.4	470.46	1.794	1.762	0.032
49	R	6	17	470.47	1.806	1.764	0.042
49	R	6	17.6	470.48	1.727	1.762	-0.035
49	R	6	18.2	470.48	1.733	1.76	-0.027
49	R	6	18.8	470.49	1.752	1.76	-0.008
49	R	6	19.4	470.49	1.683	1.761	-0.078
49	R	6	20	470.5	1.706	1.758	-0.052
49	R	6	20.6	470.51	1.727	1.758	-0.031
49	R	6	21.2	470.51	1.765	1.759	0.006
49	R	6	21.8	470.52	1.765	1.761	0.004
49	R	6	22.4	470.52	1.777	1.762	0.015
49	R	6	23	470.53	1.74	1.761	-0.021
49	R	6	23.6	470.54	1.749	1.762	-0.013
49	R	6	24.2	470.54	1.834	1.761	0.073
49	R	6	24.8	470.55	1.784	1.762	0.022
49	R	6	25.4	470.55	1.828	1.764	0.064
49	R	6	26	470.56	1.687	1.762	-0.075
49	R	6	26.7	470.57	1.792	1.761	0.031
49	R	6	27.3	470.57	1.715	1.763	-0.048
49	R	6	27.9	470.58	1.721	1.765	-0.044
49	R	6	28.5	470.59	1.792	1.765	0.027
49	R	6	29.1	470.59	1.74	1.766	-0.026
49	R	6	29.7	470.6	1.694	1.769	-0.075
49	R	6	30.3	470.6	1.787	1.772	0.015
49	R	6	30.9	470.61	1.775	1.772	0.003
49	R	6	31.5	470.62	1.755	1.774	-0.019
49	R	6	32.1	470.62	1.786	1.774	0.012
49	R	6	32.7	470.63	1.761	1.774	-0.013
49	R	6	33.3	470.63	1.801	1.775	0.026
49	R	6	33.9	470.64	1.796	1.772	0.024
49	R	6	34.5	470.65	1.744	1.773	-0.029
49	R	6	35.1	470.65	1.8	1.771	0.029
49	R	6	35.7	470.66	1.77	1.774	-0.004
49	R	6	36.3	470.66	1.796	1.774	0.022
49	R	6	37	470.67	1.85	1.776	0.074
49	R	6	37.6	470.68	1.73	1.777	-0.047
49	R	6	38.2	470.68	1.764	1.78	-0.016
49	R	6	38.8	470.69	1.796	1.784	0.012
49	R	6	39.4	470.69	1.802	1.788	0.014
49	R	6	40	470.7	1.77	1.79	-0.02
49	R	6	40.6	470.71	1.712	1.792	-0.08
49	R	6	41.2	470.71	1.806	1.794	0.012
49	R	6	41.8	470.72	1.82	1.794	0.026
49	R	6	42.4	470.72	1.781	1.794	-0.013
49	R	6	43	470.73	1.824	1.795	0.029
49	R	6	43.6	470.74	1.776	1.794	-0.018
49	R	6	44.2	470.74	1.764	1.794	-0.03
49	R	6	44.8	470.75	1.755	1.792	-0.037
49	R	6	45.4	470.75	1.756	1.793	-0.037
49	R	6	46	470.76	1.792	1.793	-0.001
49	R	6	46.6	470.77	1.785	1.792	-0.007
49	R	6	47.3	470.77	1.765	1.792	-0.027
49	R	6	47.9	470.78	1.801	1.792	0.009
49	R	6	48.5	470.79	1.799	1.791	0.008
49	R	6	49.1	470.79	1.766	1.788	-0.022
49	R	6	49.7	470.8	1.887	1.787	0.1
49	R	6	50.3	470.8	1.862	1.788	0.074
49	R	6	50.9	470.81	1.835	1.786	0.049
49	R	6	51.5	470.82	1.863	1.785	0.078
49	R	6	52.1	470.82	1.85	1.783	0.067
49	R	6	52.7	470.83	1.826	1.781	0.045
49	R	6	53.3	470.83	1.771	1.781	-0.01
49	R	6	53.9	470.84	1.781	1.783	-0.002
49	R	6	54.5	470.85	1.826	1.782	0.044
49	R	6	55.1	470.85	1.762	1.783	-0.021
49	R	6	55.7	470.86	1.744	1.78	-0.036
49	R	6	56.3	470.86	1.747	1.776	-0.029
49	R	6	56.9	470.87	1.787	1.776	0.011
49	R	6	57.6	470.88	1.809	1.775	0.034
49	R	6	58.2	470.88	1.813	1.776	0.037
49	R	6	58.8	470.89	1.728	1.778	-0.05
49	R	6	59.4	470.89	1.773	1.776	-0.003
49	R	6	60	470.9	1.732	1.775	-0.043
49	R	6	60.6	470.91	1.713	1.777	-0.064
49	R	6	61.2	470.91	1.741	1.776	-0.035
49	R	6	61.8	470.92	1.744	1.775	-0.031
49	R	6	62.4	470.92	1.726	1.775	-0.049
49	R	6	63	470.93	1.786	1.777	0.009
49	R	6	63.6	470.94	1.71	1.776	-0.066
49	R	6	64.2	470.94	1.766	1.777	-0.011
49	R	6	64.8	470.95	1.76	1.779	-0.019
49	R	6	65.4	470.95	1.839	1.781	0.058
49	R	6	66	470.96	1.73	1.784	-0.054
49	R	6	66.6	470.97	1.775	1.783	-0.008
49	R	6	67.2	470.97	1.683	1.783	-0.1
49	R	6	67.8	470.98	1.677	1.781	-0.104
49	R	6	68.5	470.99	1.759	1.786	-0.027
49	R	6	69.1	470.99	1.761	1.789	-0.028
49	R	6	69.7	471	1.817	1.793	0.024
49	R	6	70.3	471	1.832	1.799	0.033
49	R	6	70.9	471.01	1.821	1.803	0.018
49	R	6	71.5	471.02	1.837	1.807	0.03
49	R	6	72.1	471.02	1.9	1.813	0.087
49	R	6	72.7	471.03	1.835	1.816	0.019
49	R	6	73.3	471.03	1.825	1.821	0.004
49	R	6	73.9	471.04	1.811	1.822	-0.011
49	R	6	74.5	471.05	1.854	1.825	0.029
49	R	6	75.1	471.05	1.753	1.824	-0.071
49	R	6	75.7	471.06	1.834	1.826	0.008
49	R	6	76.3	471.06	1.847	1.827	0.02
49	R	6	76.9	471.07	1.824	1.833	-0.009
49	R	6	77.5	471.08	1.828	1.839	-0.011
49	R	6	78.1	471.08	1.762	1.842	-0.08
49	R	6	78.8	471.09	1.792	1.842	-0.05
49	R	6	79.4	471.09	1.756	1.842	-0.086
49	R	6	80	471.1	1.917	1.841	0.076
49	R	6	80.6	471.11	1.855	1.835	0.02
49	R	6	81.2	471.11	1.882	1.831	0.051
49	R	6	81.8	471.12	1.928	1.823	0.105
49	R	6	82.4	471.12	1.895	1.82	0.075
49	R	6	83	471.13	1.856	1.817	0.039
49	R	6	83.6	471.14	1.932	1.815	0.117
49	R	6	84.2	471.14	1.891	1.812	0.079
49	R	6	84.8	471.15	1.888	1.812	0.076
49	R	6	85.4	471.15	1.816	1.809	0.007
49	R	6	86	471.16	1.849	1.806	0.043
49	R	6	86.6	471.17	1.804	1.804	0
49	R	6	87.2	471.17	1.828	1.801	0.027
49	R	6	87.8	471.18	1.791	1.8	-0.009
49	R	6	88.4	471.18	1.908	1.798	0.11
49	R	6	89.1	471.19	1.862	1.798	0.064
49	R	6	89.7	471.2	1.871	1.792	0.079
49	R	6	90.3	471.2	1.781	1.787	-0.006
49	R	6	90.9	471.21	1.807	1.782	0.025
49	R	6	91.5	471.22	1.811	1.776	0.035
49	R	6	92.1	471.22	1.609	1.771	-0.162
49	R	6	92.7	471.23	1.674	1.767	-0.093
49	R	6	93.3	471.23	1.641	1.761	-0.12
49	R	6	93.9	471.24	1.706	1.756	-0.05
49	R	6	94.5	471.25	1.74	1.749	-0.009
49	R	6	95.1	471.25	1.734	1.746	-0.012
49	R	6	95.7	471.26	1.75	1.743	0.007
49	R	6	96.3	471.26	1.759	1.742	0.017
49	R	6	96.9	471.27	1.738	1.74	-0.002
49	R	6	97.5	471.28	1.719	1.736	-0.017
49	R	6	98.1	471.28	1.773	1.733	0.04
49	R	6	98.7	471.29	1.711	1.729	-0.018
49	R	6	99.4	471.29	1.718	1.725	-0.007
49	R	6	100	471.3	1.742	1.723	0.019
49	R	6	100.6	471.31	1.737	1.721	0.016
49	R	6	101.2	471.31	1.728	1.722	0.006
49	R	6	101.8	471.32	1.678	1.729	-0.051
49	R	6	102.4	471.32	1.679	1.735	-0.056
49	R	6	103	471.33	1.729	1.74	-0.011
49	R	6	103.6	471.34	1.716	1.745	-0.029
49	R	6	104.2	471.34	1.736	1.75	-0.014
49	R	6	104.8	471.35	1.727	1.755	-0.028
49	R	6	105.4	471.35	1.683	1.759	-0.076
49	R	6	106	471.36	1.669	1.765	-0.096
49	R	6	106.6	471.37	1.686	1.769	-0.083
49	R	6	107.2	471.37	1.747	1.772	-0.025
49	R	6	107.8	471.38	1.792	1.768	0.024
49	R	6	108.4	471.38	1.758	1.766	-0.008
49	R	6	109	471.39	1.653	1.77	-0.117
49	R	6	109.6	471.4	1.789	1.77	0.019
49	R	6	110.3	471.4	1.74	1.77	-0.03
49	R	6	110.9	471.41	1.713	1.77	-0.057
49	R	6	111.5	471.42	1.701	1.772	-0.071
49	R	6	112.1	471.42	1.743	1.775	-0.032
49	R	6	112.7	471.43	1.847	1.776	0.071
49	R	6	113.3	471.43	1.844	1.783	0.061
49	R	6	113.9	471.44	1.885	1.785	0.1
49	R	6	114.5	471.45	1.843	1.784	0.059
49	R	6	115.1	471.45	1.878	1.786	0.092
49	R	6	115.7	471.46	1.896	1.787	0.109
49	R	6	116.3	471.46	1.922	1.79	0.132
49	R	6	116.9	471.47	1.894	1.788	0.106
49	R	6	117.5	471.48	1.952	1.785	0.167
49	R	6	118.1	471.48	1.893	1.784	0.109
49	R	6	118.7	471.49	1.827	1.786	0.041
49	R	6	119.3	471.49	1.627	1.785	-0.158
49	R	6	119.9	471.5	1.627	1.789	-0.162
49	R	6	120.6	471.51	1.868	1.795	0.073
49	R	6	121.2	471.51	1.744	1.799	-0.055
49	R	6	121.8	471.52	1.728	1.802	-0.074
49	R	6	122.4	471.52	1.723	1.801	-0.078
49	R	6	123	471.53	1.773	1.801	-0.028
49	R	6	123.6	471.54	1.761	1.796	-0.035
49	R	6	124.2	471.54	1.761	1.794	-0.033
49	R	6	124.8	471.55	1.962	1.791	0.171
49	R	6	125.4	471.55	1.819	1.787	0.032
49	R	6	126	471.56	1.697	1.786	-0.089
49	R	6	126.6	471.57	1.744	1.783	-0.039
49	R	6	127.2	471.57	1.717	1.78	-0.063
49	R	6	127.8	471.58	1.773	1.778	-0.005
49	R	6	128.4	471.58	1.69	1.779	-0.089
49	R	6	129	471.59	1.7	1.784	-0.084
49	R	6	129.6	471.6	1.718	1.789	-0.071
49	R	6	130.2	471.6	1.716	1.782	-0.066
49	R	6	130.9	471.61	1.762	1.78	-0.018
49	R	6	131.5	471.62	1.864	1.781	0.083
49	R	6	132.1	471.62	1.933	1.783	0.15
49	R	6	132.7	471.63	1.837	1.78	0.057
49	R	6	133.3	471.63	1.843	1.779	0.064
49	R	6	133.9	471.64	1.821	1.779	0.042
49	R	6	134.5	471.65	1.837	1.773	0.064
49	R	6	135.1	471.65	1.726	1.772	-0.046
49	R	6	135.7	471.66	1.771	1.775	-0.004
49	R	6	136.3	471.66	1.762	1.775	-0.013
49	R	6	136.9	471.67	1.764	1.768	-0.004
49	R	6	137.5	471.68	1.861	1.761	0.1
49	R	6	138.1	471.68	1.795	1.763	0.032
49	R	6	138.7	471.69	1.869	1.764	0.105
49	R	6	139.3	471.69	1.826	1.763	0.063
49	R	6	139.9	471.7	1.843	1.763	0.08
49	R	6	140.5	471.71	1.813	1.765	0.048
49	R	6	141.2	471.71	1.786	1.762	0.024
49	R	6	142.4	471.72	1.641	1.756	-0.115
49	R	6	143	471.73	1.678	1.754	-0.076
49	R	6	143.6	471.74	1.754	1.752	0.002
49	R	6	144.2	471.74	1.785	1.751	0.034
49	R	6	144.8	471.75	1.658	1.75	-0.092
49	R	6	145.4	471.75	1.746	1.75	-0.004
49	R	6	146	471.76	1.753	1.75	0.003
49	R	6	146.6	471.77	1.761	1.751	0.01
49	R	6	147.2	471.77	1.781	1.749	0.032
49	R	6	147.8	471.78	1.801	1.747	0.054
49	R	6	148.4	471.78	1.747	1.749	-0.002
49	R	6	149	471.79	1.463	1.746	-0.283
49	R	7	1.2	471.81	1.542	1.744	-0.202
49	R	7	1.8	471.82	1.762	1.742	0.02
49	R	7	2.4	471.82	1.736	1.743	-0.007
49	R	7	3	471.83	1.652	1.745	-0.093
49	R	7	3.6	471.84	1.749	1.751	-0.002
49	R	7	4.2	471.84	1.799	1.757	0.042
49	R	7	4.8	471.85	1.762	1.759	0.003
49	R	7	5.5	471.86	1.726	1.761	-0.035
49	R	7	6.1	471.86	1.761	1.767	-0.006
49	R	7	6.7	471.87	1.772	1.769	0.003
49	R	7	7.3	471.87	1.803	1.772	0.031
49	R	7	7.9	471.88	1.795	1.776	0.019
49	R	7	8.5	471.89	1.718	1.775	-0.057
49	R	7	9.1	471.89	1.794	1.775	0.019
49	R	7	9.7	471.9	1.781	1.778	0.003
49	R	7	10.3	471.9	1.707	1.789	-0.082
49	R	7	10.9	471.91	1.783	1.797	-0.014
49	R	7	11.5	471.92	1.855	1.796	0.059
49	R	7	12.1	471.92	1.793	1.795	-0.002
49	R	7	12.7	471.93	1.75	1.796	-0.046
49	R	7	13.3	471.93	1.748	1.795	-0.047
49	R	7	13.9	471.94	1.856	1.792	0.064
49	R	7	14.5	471.95	1.854	1.791	0.063
49	R	7	15.1	471.95	1.847	1.792	0.055
49	R	7	15.8	471.96	1.893	1.794	0.099
49	R	7	16.4	471.96	1.839	1.794	0.045
49	R	7	17	471.97	1.843	1.794	0.049
49	R	7	17.6	471.98	1.873	1.793	0.08
49	R	7	18.2	471.98	1.827	1.795	0.032
49	R	7	18.8	471.99	1.85	1.795	0.055
49	R	7	19.4	471.99	1.882	1.795	0.087
49	R	7	20	472	1.769	1.796	-0.027
49	R	7	20.6	472.01	1.808	1.794	0.014
49	R	7	21.2	472.01	1.85	1.793	0.057
49	R	7	21.8	472.02	1.82	1.791	0.029
49	R	7	22.4	472.02	1.826	1.792	0.034
49	R	7	23	472.03	1.731	1.793	-0.062
49	R	7	23.6	472.04	1.701	1.792	-0.091
49	R	7	24.2	472.04	1.702	1.786	-0.084
49	R	7	24.8	472.05	1.722	1.785	-0.063
49	R	7	25.4	472.05	1.681	1.781	-0.1
49	R	7	26	472.06	1.733	1.78	-0.047
49	R	7	26.7	472.07	1.742	1.779	-0.037
49	R	7	27.3	472.07	1.828	1.776	0.052
49	R	7	27.9	472.08	1.779	1.777	0.002
49	R	7	28.5	472.09	1.813	1.776	0.037
49	R	7	29.1	472.09	1.752	1.776	-0.024
49	R	7	29.7	472.1	1.777	1.778	-0.001
49	R	7	30.3	472.1	1.794	1.78	0.014
49	R	7	30.9	472.11	1.805	1.782	0.023
49	R	7	31.5	472.12	1.723	1.783	-0.06
49	R	7	32.1	472.12	1.738	1.782	-0.044
49	R	7	32.7	472.13	1.794	1.786	0.008
49	R	7	33.3	472.13	1.752	1.791	-0.039
49	R	7	33.9	472.14	1.778	1.79	-0.012
49	R	7	34.5	472.15	1.761	1.793	-0.032
49	R	7	35.1	472.15	1.821	1.797	0.024
49	R	7	35.7	472.16	1.671	1.8	-0.129
49	R	7	36.3	472.16	1.801	1.801	0
49	R	7	37	472.17	1.748	1.802	-0.054
49	R	7	37.6	472.18	1.802	1.806	-0.004
49	R	7	38.2	472.18	1.794	1.809	-0.015
49	R	7	38.8	472.19	1.769	1.811	-0.042
49	R	7	39.4	472.19	1.884	1.815	0.069
49	R	7	40	472.2	1.817	1.811	0.006
49	R	7	40.6	472.21	1.859	1.8	0.059
49	R	7	41.2	472.21	1.871	1.799	0.072
49	R	7	41.8	472.22	1.861	1.792	0.069
49	R	7	42.4	472.22	1.908	1.783	0.125
49	R	7	43	472.23	1.852	1.774	0.078
49	R	7	43.6	472.24	1.804	1.772	0.032
49	R	7	44.2	472.24	1.889	1.769	0.12
49	R	7	44.8	472.25	1.873	1.766	0.107
49	R	7	45.4	472.25	1.651	1.764	-0.113
49	R	7	46	472.26	1.843	1.754	0.089
49	R	7	46.6	472.27	1.81	1.755	0.055
49	R	7	47.3	472.27	1.832	1.756	0.076
49	R	7	47.9	472.28	1.787	1.756	0.031
49	R	7	48.5	472.29	1.874	1.753	0.121
49	R	7	49.1	472.29	1.889	1.742	0.147
49	R	7	49.7	472.3	1.927	1.736	0.191
49	R	7	50.3	472.3	1.828	1.732	0.096
49	R	7	50.9	472.31	1.898	1.726	0.172
49	R	7	51.5	472.32	1.661	1.723	-0.062
49	R	7	52.1	472.32	1.43	1.718	-0.288
49	R	7	52.7	472.33	1.672	1.716	-0.044
49	R	7	53.3	472.33	1.523	1.716	-0.193
49	R	7	53.9	472.34	1.466	1.71	-0.244
50	R	1	1.2	472.51	1.432	1.703	-0.271
50	R	1	1.8	472.52	1.705	1.706	-0.001
50	R	1	2.4	472.52	1.659	1.704	-0.045
50	R	1	3	472.53	1.731	1.704	0.027
50	R	1	3.6	472.54	1.584	1.703	-0.119
50	R	1	7.3	472.57	1.473	1.704	-0.231
50	R	1	7.9	472.58	1.766	1.696	0.07
50	R	1	8.5	472.59	1.833	1.685	0.148
50	R	1	9.1	472.59	1.788	1.675	0.113
50	R	1	9.7	472.6	1.662	1.674	-0.012
50	R	1	10.3	472.6	1.523	1.672	-0.149
50	R	1	10.9	472.61	1.583	1.674	-0.091
50	R	1	11.5	472.62	1.742	1.671	0.071
50	R	1	12.1	472.62	1.638	1.671	-0.033
50	R	1	12.7	472.63	1.774	1.677	0.097
50	R	1	13.3	472.63	1.716	1.686	0.03
50	R	1	13.9	472.64	1.806	1.695	0.111
50	R	1	14.5	472.65	1.775	1.696	0.079
50	R	1	15.1	472.65	1.692	1.69	0.002
50	R	1	15.8	472.66	1.631	1.686	-0.055
50	R	1	16.4	472.66	1.753	1.68	0.073
50	R	1	17	472.67	1.76	1.679	0.081
50	R	1	17.6	472.68	1.833	1.676	0.157
50	R	1	18.2	472.68	1.8	1.674	0.126
50	R	1	18.8	472.69	1.825	1.673	0.152
50	R	1	19.4	472.69	1.596	1.668	-0.072
50	R	1	20	472.7	1.499	1.665	-0.166
50	R	1	20.6	472.71	1.573	1.664	-0.091
50	R	1	21.2	472.71	1.771	1.664	0.107
50	R	1	21.8	472.72	1.839	1.662	0.177
50	R	1	22.4	472.72	1.749	1.656	0.093
50	R	1	23	472.73	1.319	1.654	-0.335
50	R	1	23.6	472.74	1.653	1.643	0.01
50	R	1	24.2	472.74	1.742	1.639	0.103
50	R	1	24.8	472.75	1.796	1.644	0.152
50	R	1	25.4	472.75	1.75	1.649	0.101
50	R	1	26	472.76	1.743	1.648	0.095
50	R	1	26.7	472.77	1.421	1.648	-0.227
50	R	1	28.5	472.79	1.6	1.645	-0.045
50	R	1	29.1	472.79	1.371	1.647	-0.276
50	R	1	29.7	472.8	1.437	1.646	-0.209
50	R	1	30.3	472.8	1.667	1.652	0.015
50	R	1	30.9	472.81	1.773	1.657	0.116
50	R	1	31.5	472.82	1.753	1.651	0.102
50	R	1	32.1	472.82	1.487	1.646	-0.159
50	R	1	33.3	472.83	1.408	1.644	-0.236
50	R	1	33.9	472.84	1.54	1.642	-0.102
50	R	1	34.5	472.85	1.738	1.646	0.092
50	R	1	35.1	472.85	1.59	1.646	-0.056
50	R	1	37	472.87	1.567	1.645	-0.078
50	R	1	37.6	472.88	1.639	1.645	-0.006
50	R	1	38.2	472.88	1.424	1.64	-0.216
50	R	1	38.8	472.89	1.63	1.633	-0.003
50	R	1	39.4	472.89	1.867	1.641	0.226
50	R	1	40	472.9	1.818	1.644	0.174
50	R	1	40.6	472.91	1.715	1.655	0.06
50	R	1	41.2	472.91	1.746	1.664	0.082
50	R	1	41.8	472.92	1.739	1.669	0.07
50	R	1	42.4	472.92	1.857	1.671	0.186
50	R	1	43	472.93	1.8	1.667	0.133
50	R	1	43.6	472.94	1.809	1.668	0.141
50	R	1	44.2	472.94	1.675	1.675	0
50	R	1	44.8	472.95	1.349	1.673	-0.324
50	R	1	45.4	472.95	1.587	1.657	-0.07
50	R	1	46	472.96	1.797	1.658	0.139
50	R	1	46.6	472.97	1.67	1.662	0.008
50	R	1	47.3	472.97	1.462	1.663	-0.201
50	R	1	47.9	472.98	1.653	1.671	-0.018
50	R	1	48.5	472.99	1.701	1.672	0.029
50	R	1	49.1	472.99	1.803	1.67	0.133
50	R	1	49.7	473	1.547	1.666	-0.119
50	R	1	50.3	473	1.508	1.669	-0.161
50	R	1	50.9	473.01	1.724	1.671	0.053
50	R	1	51.5	473.02	1.701	1.673	0.028
50	R	1	52.1	473.02	1.753	1.667	0.086
50	R	1	52.7	473.03	1.75	1.661	0.089
50	R	1	53.3	473.03	1.848	1.651	0.197
50	R	1	53.9	473.04	1.813	1.647	0.166
50	R	1	54.5	473.05	1.624	1.658	-0.034
50	R	1	55.7	473.06	1.528	1.66	-0.132
50	R	1	56.3	473.06	1.643	1.658	-0.015
50	R	1	56.9	473.07	1.471	1.659	-0.188
50	R	1	58.2	473.08	1.187	1.667	-0.48
50	R	1	58.8	473.09	1.62	1.667	-0.047
50	R	1	59.4	473.09	1.702	1.67	0.032
50	R	1	60	473.1	1.674	1.673	0.001
50	R	1	60.6	473.11	1.728	1.681	0.047
50	R	1	61.2	473.11	1.664	1.69	-0.026
50	R	1	61.8	473.12	1.781	1.689	0.092
50	R	1	62.4	473.12	1.684	1.687	-0.003
50	R	1	63	473.13	1.806	1.69	0.116
50	R	1	63.6	473.14	1.827	1.69	0.137
50	R	1	64.2	473.14	1.803	1.691	0.112
50	R	1	64.8	473.15	1.661	1.689	-0.028
50	R	1	65.4	473.15	1.596	1.688	-0.092
50	R	1	66.6	473.17	1.444	1.688	-0.244
50	R	1	67.2	473.17	1.55	1.689	-0.139
50	R	1	69.1	473.19	1.707	1.69	0.017
50	R	1	69.7	473.2	1.675	1.701	-0.026
50	R	1	70.3	473.2	1.738	1.703	0.035
50	R	1	70.9	473.21	1.695	1.702	-0.007
50	R	1	71.5	473.22	1.721	1.703	0.018
50	R	1	72.1	473.22	1.67	1.702	-0.032
50	R	1	72.7	473.23	1.794	1.705	0.089
50	R	1	73.3	473.23	1.915	1.704	0.211
50	R	1	73.9	473.24	1.823	1.706	0.117
50	R	1	74.5	473.25	1.84	1.704	0.136
50	R	1	75.1	473.25	1.67	1.703	-0.033
50	R	1	75.7	473.26	1.646	1.706	-0.06
50	R	1	76.3	473.26	1.863	1.711	0.152
50	R	1	76.9	473.27	1.725	1.714	0.011
50	R	1	77.5	473.28	1.898	1.722	0.176
50	R	1	78.1	473.28	1.757	1.729	0.028
50	R	1	78.8	473.29	1.589	1.731	-0.142
50	R	1	79.4	473.29	1.514	1.728	-0.214
50	R	1	80	473.3	1.694	1.729	-0.035
50	R	1	80.6	473.31	1.473	1.731	-0.258
50	R	1	81.2	473.31	1.598	1.732	-0.134
50	R	1	81.8	473.32	1.677	1.735	-0.058
50	R	1	82.4	473.32	1.663	1.733	-0.07
50	R	1	83	473.33	1.707	1.726	-0.019
50	R	1	83.6	473.34	1.69	1.722	-0.032
50	R	1	84.2	473.34	1.79	1.72	0.07
50	R	1	84.8	473.35	1.738	1.724	0.014
50	R	1	85.4	473.35	1.76	1.73	0.03
50	R	1	86	473.36	1.736	1.725	0.011
50	R	1	86.6	473.37	1.796	1.721	0.075
50	R	1	87.2	473.37	1.9	1.712	0.188
50	R	1	87.8	473.38	1.85	1.713	0.137
50	R	1	88.4	473.38	1.698	1.718	-0.02
50	R	1	89.1	473.39	1.698	1.727	-0.029
50	R	1	89.7	473.4	1.81	1.73	0.08
50	R	1	90.3	473.4	1.778	1.739	0.039
50	R	1	90.9	473.41	1.555	1.744	-0.189
50	R	1	91.5	473.42	1.781	1.741	0.04
50	R	1	92.1	473.42	1.754	1.746	0.008
50	R	1	92.7	473.43	1.757	1.748	0.009
50	R	1	93.3	473.43	1.772	1.749	0.023
50	R	1	93.9	473.44	1.757	1.75	0.007
50	R	1	94.5	473.45	1.654	1.752	-0.098
50	R	1	95.1	473.45	1.683	1.75	-0.067
50	R	1	95.7	473.46	1.759	1.749	0.01
50	R	1	96.3	473.46	1.806	1.75	0.056
50	R	1	96.9	473.47	1.872	1.745	0.127
50	R	1	97.5	473.48	1.702	1.741	-0.039
50	R	1	98.1	473.48	1.566	1.74	-0.174
50	R	1	98.7	473.49	1.587	1.74	-0.153
50	R	1	99.4	473.49	1.776	1.736	0.04
50	R	1	100	473.5	1.793	1.736	0.057
50	R	1	100.6	473.51	1.83	1.743	0.087
50	R	1	101.2	473.51	1.8	1.743	0.057
50	R	1	101.8	473.52	1.772	1.744	0.028
50	R	1	102.4	473.52	1.785	1.746	0.039
50	R	1	103	473.53	1.569	1.749	-0.18
50	R	1	103.6	473.54	1.827	1.751	0.076
50	R	1	104.2	473.54	1.768	1.756	0.012
50	R	1	104.8	473.55	1.749	1.761	-0.012
50	R	1	105.4	473.55	1.825	1.763	0.062
50	R	1	106	473.56	1.781	1.762	0.019
50	R	1	106.6	473.57	1.709	1.762	-0.053
50	R	1	107.2	473.57	1.712	1.767	-0.055
50	R	1	107.8	473.58	1.803	1.775	0.028
50	R	1	108.4	473.58	1.746	1.773	-0.027
50	R	1	109	473.59	1.717	1.768	-0.051
50	R	1	109.6	473.6	1.63	1.765	-0.135
50	R	1	110.3	473.6	1.699	1.761	-0.062
50	R	1	110.9	473.61	1.7	1.763	-0.063
50	R	1	111.5	473.62	1.769	1.766	0.003
50	R	1	112.1	473.62	1.788	1.767	0.021
50	R	1	112.7	473.63	1.778	1.774	0.004
50	R	1	113.3	473.63	1.787	1.774	0.013
50	R	1	113.9	473.64	1.843	1.776	0.067
50	R	1	114.5	473.65	1.873	1.774	0.099
50	R	1	115.1	473.65	1.84	1.771	0.069
50	R	1	115.7	473.66	1.826	1.769	0.057
50	R	1	116.3	473.66	1.832	1.77	0.062
50	R	1	116.9	473.67	1.837	1.771	0.066
50	R	1	117.5	473.68	1.762	1.771	-0.009
50	R	1	118.1	473.68	1.872	1.773	0.099
50	R	1	118.7	473.69	1.888	1.773	0.115
50	R	1	119.3	473.69	1.839	1.767	0.072
50	R	1	119.9	473.7	1.515	1.767	-0.252
50	R	1	120.6	473.71	1.628	1.765	-0.137
50	R	1	121.2	473.71	1.66	1.765	-0.105
50	R	1	121.8	473.72	1.717	1.764	-0.047
50	R	1	122.4	473.72	1.863	1.765	0.098
50	R	1	123	473.73	1.886	1.765	0.121
50	R	1	123.6	473.74	1.823	1.757	0.066
50	R	1	124.2	473.74	1.785	1.753	0.032
50	R	1	124.8	473.75	1.835	1.75	0.085
50	R	1	125.4	473.75	1.836	1.748	0.088
50	R	1	126	473.76	1.697	1.745	-0.048
50	R	1	126.6	473.77	1.701	1.743	-0.042
50	R	1	127.2	473.77	1.703	1.745	-0.042
50	R	1	127.8	473.78	1.759	1.744	0.015
50	R	1	128.4	473.78	1.742	1.741	0.001
50	R	1	129	473.79	1.819	1.738	0.081
50	R	1	129.6	473.8	1.797	1.741	0.056
50	R	1	130.2	473.8	1.726	1.743	-0.017
50	R	1	130.9	473.81	1.436	1.747	-0.311
50	R	1	131.5	473.82	1.686	1.75	-0.064
50	R	1	132.1	473.82	1.622	1.74	-0.118
50	R	1	132.7	473.83	1.776	1.734	0.042
50	R	1	133.3	473.83	1.734	1.731	0.003
50	R	1	133.9	473.84	1.825	1.728	0.097
50	R	1	134.5	473.85	1.779	1.727	0.052
50	R	1	135.1	473.85	1.578	1.726	-0.148
50	R	1	135.7	473.86	1.745	1.726	0.019
50	R	1	136.3	473.86	1.711	1.728	-0.017
50	R	1	136.9	473.87	1.765	1.731	0.034
50	R	1	137.5	473.88	1.73	1.734	-0.004
50	R	1	138.1	473.88	1.778	1.736	0.042
50	R	1	138.7	473.89	1.806	1.732	0.074
50	R	1	139.3	473.89	1.852	1.729	0.123
50	R	1	139.9	473.9	1.796	1.729	0.067
50	R	1	140.5	473.91	1.717	1.735	-0.018
50	R	1	141.2	473.91	1.625	1.738	-0.113
50	R	1	141.8	473.92	1.684	1.742	-0.058
50	R	1	142.4	473.92	1.817	1.744	0.073
50	R	1	143	473.93	1.808	1.749	0.059
50	R	1	143.6	473.94	1.53	1.748	-0.218
50	R	1	144.8	473.95	1.653	1.749	-0.096
50	R	1	145.4	473.95	1.725	1.754	-0.029
50	R	1	146	473.96	1.672	1.754	-0.082
50	R	1	146.6	473.97	1.804	1.758	0.046
50	R	1	147.2	473.97	1.8	1.76	0.04
50	R	1	147.8	473.98	1.707	1.763	-0.056
50	R	2	0.6	474.01	1.79	1.763	0.027
50	R	2	1.2	474.01	1.799	1.762	0.037
50	R	2	1.8	474.02	1.844	1.76	0.084
50	R	2	2.4	474.02	1.816	1.761	0.055
50	R	2	3	474.03	1.672	1.764	-0.092
50	R	2	3.6	474.04	1.722	1.77	-0.048
50	R	2	4.2	474.04	1.713	1.775	-0.062
50	R	2	4.8	474.05	1.656	1.775	-0.119
50	R	2	5.5	474.06	1.766	1.774	-0.008
50	R	2	6.1	474.06	1.789	1.779	0.01
50	R	2	6.7	474.07	1.837	1.781	0.056
50	R	2	7.3	474.07	1.898	1.78	0.118
50	R	2	7.9	474.08	1.812	1.781	0.031
50	R	2	8.5	474.09	1.785	1.778	0.007
50	R	2	9.1	474.09	1.752	1.775	-0.023
50	R	2	9.7	474.1	1.759	1.774	-0.015
50	R	2	10.3	474.1	1.836	1.772	0.064
50	R	2	10.9	474.11	1.849	1.77	0.079
50	R	2	11.5	474.12	1.837	1.767	0.07
50	R	2	12.1	474.12	1.773	1.765	0.008
50	R	2	12.7	474.13	1.762	1.767	-0.005
50	R	2	13.3	474.13	1.788	1.766	0.022
50	R	2	13.9	474.14	1.851	1.769	0.082
50	R	2	14.5	474.15	1.815	1.775	0.04
50	R	2	15.1	474.15	1.828	1.777	0.051
50	R	2	15.8	474.16	1.843	1.777	0.066
50	R	2	16.4	474.16	1.838	1.771	0.067
50	R	2	17	474.17	1.783	1.756	0.027
50	R	2	17.6	474.18	1.674	1.753	-0.079
50	R	2	18.2	474.18	1.738	1.752	-0.014
50	R	2	18.8	474.19	1.697	1.751	-0.054
50	R	2	19.4	474.19	1.697	1.751	-0.054
50	R	2	20	474.2	1.713	1.753	-0.04
50	R	2	20.6	474.21	1.67	1.753	-0.083
50	R	2	21.2	474.21	1.681	1.751	-0.07
50	R	2	21.8	474.22	1.716	1.754	-0.038
50	R	2	22.4	474.22	1.74	1.756	-0.016
50	R	2	23	474.23	1.727	1.75	-0.023
50	R	2	23.6	474.24	1.742	1.746	-0.004
50	R	2	24.2	474.24	1.765	1.744	0.021
50	R	2	24.8	474.25	1.676	1.744	-0.068
50	R	2	25.4	474.25	1.83	1.742	0.088
50	R	2	26	474.26	1.863	1.735	0.128
50	R	2	26.7	474.27	1.827	1.722	0.105
50	R	2	27.3	474.27	1.796	1.721	0.075
50	R	2	27.9	474.28	1.623	1.718	-0.095
50	R	2	28.5	474.29	1.39	1.718	-0.328
50	R	2	29.1	474.29	1.708	1.717	-0.009
50	R	2	29.7	474.3	1.716	1.715	0.001
50	R	2	30.3	474.3	1.732	1.715	0.017
50	R	2	30.9	474.31	1.764	1.714	0.05
50	R	2	31.5	474.32	1.903	1.714	0.189
50	R	2	32.1	474.32	1.844	1.711	0.133
50	R	2	32.7	474.33	1.766	1.708	0.058
50	R	2	33.3	474.33	1.884	1.708	0.176
50	R	2	33.9	474.34	1.827	1.707	0.12
50	R	2	34.5	474.35	1.57	1.71	-0.14
50	R	2	35.1	474.35	1.714	1.708	0.006
50	R	2	35.7	474.36	1.763	1.705	0.058
50	R	2	36.3	474.36	1.828	1.704	0.124
50	R	2	37	474.37	1.774	1.702	0.072
50	R	2	37.6	474.38	1.6	1.705	-0.105
50	R	2	38.2	474.38	1.318	1.716	-0.398
50	R	2	38.8	474.39	1.633	1.718	-0.085
50	R	2	39.4	474.39	1.647	1.718	-0.071
50	R	2	40	474.4	1.678	1.721	-0.043
50	R	2	40.6	474.41	1.655	1.719	-0.064
50	R	2	41.2	474.41	1.652	1.713	-0.061
50	R	2	41.8	474.42	1.685	1.711	-0.026
50	R	2	42.4	474.42	1.632	1.712	-0.08
50	R	2	43	474.43	1.715	1.709	0.006
50	R	2	43.6	474.44	1.623	1.708	-0.085
50	R	2	44.2	474.44	1.633	1.711	-0.078
50	R	2	44.8	474.45	1.74	1.713	0.027
50	R	2	45.4	474.45	1.721	1.713	0.008
50	R	2	46	474.46	1.787	1.713	0.074
50	R	2	46.6	474.47	1.759	1.715	0.044
50	R	2	47.3	474.47	1.772	1.721	0.051
50	R	2	47.9	474.48	1.796	1.736	0.06
50	R	2	48.5	474.49	1.718	1.741	-0.023
50	R	2	49.1	474.49	1.73	1.74	-0.01
50	R	2	49.7	474.5	1.79	1.742	0.048
50	R	2	50.3	474.5	1.748	1.746	0.002
50	R	2	50.9	474.51	1.731	1.745	-0.014
50	R	2	51.5	474.52	1.828	1.743	0.085
50	R	2	52.1	474.52	1.702	1.742	-0.04
50	R	2	52.7	474.53	1.694	1.734	-0.04
50	R	2	53.3	474.53	1.762	1.737	0.025
50	R	2	53.9	474.54	1.82	1.745	0.075
50	R	2	54.5	474.55	1.768	1.749	0.019
50	R	2	55.1	474.55	1.793	1.749	0.044
50	R	2	55.7	474.56	1.683	1.747	-0.064
50	R	2	56.3	474.56	1.791	1.747	0.044
50	R	2	56.9	474.57	1.761	1.746	0.015
50	R	2	57.6	474.58	1.833	1.748	0.085
50	R	2	58.2	474.58	1.818	1.752	0.066
50	R	2	58.8	474.59	1.815	1.755	0.06
50	R	2	59.4	474.59	1.835	1.751	0.084
50	R	2	60	474.6	1.834	1.749	0.085
50	R	2	60.6	474.61	1.593	1.745	-0.152
50	R	2	61.2	474.61	1.757	1.743	0.014
50	R	2	61.8	474.62	1.783	1.744	0.039
50	R	2	62.4	474.62	1.621	1.75	-0.129
50	R	2	63	474.63	1.635	1.75	-0.115
50	R	2	63.6	474.64	1.569	1.747	-0.178
50	R	2	64.2	474.64	1.451	1.745	-0.294
50	R	2	64.8	474.65	1.71	1.747	-0.037
50	R	2	65.4	474.65	1.938	1.749	0.189
50	R	2	66	474.66	1.886	1.748	0.138
50	R	2	66.6	474.67	1.714	1.748	-0.034
50	R	2	67.2	474.67	1.724	1.737	-0.013
50	R	2	67.8	474.68	1.73	1.73	0
50	R	2	68.5	474.69	1.766	1.726	0.04
50	R	2	69.1	474.69	1.837	1.723	0.114
50	R	2	69.7	474.7	1.854	1.721	0.133
50	R	2	70.3	474.7	1.847	1.72	0.127
50	R	2	70.9	474.71	1.643	1.711	-0.068
50	R	2	71.5	474.72	1.681	1.702	-0.021
50	R	2	72.1	474.72	1.609	1.703	-0.094
50	R	2	72.7	474.73	1.732	1.707	0.025
50	R	2	73.3	474.73	1.769	1.713	0.056
50	R	2	73.9	474.74	1.887	1.724	0.163
50	R	2	74.5	474.75	1.775	1.727	0.048
50	R	2	75.1	474.75	1.71	1.722	-0.012
50	R	2	75.7	474.76	1.695	1.709	-0.014
50	R	2	76.3	474.76	1.847	1.704	0.143
50	R	2	76.9	474.77	1.78	1.703	0.077
50	R	2	77.5	474.78	1.743	1.705	0.038
50	R	2	78.1	474.78	1.746	1.702	0.044
50	R	2	78.8	474.79	1.445	1.691	-0.246
50	R	2	79.4	474.79	1.602	1.689	-0.087
50	R	2	80	474.8	1.674	1.688	-0.014
50	R	2	80.6	474.81	1.702	1.695	0.007
50	R	2	81.2	474.81	1.779	1.695	0.084
50	R	2	81.8	474.82	1.575	1.695	-0.12
50	R	2	82.4	474.82	1.442	1.695	-0.253
50	R	2	83	474.83	1.448	1.695	-0.247
50	R	2	83.6	474.84	1.669	1.692	-0.023
50	R	2	84.2	474.84	1.762	1.692	0.07
50	R	2	84.8	474.85	1.784	1.697	0.087
50	R	2	85.4	474.85	1.836	1.702	0.134
50	R	2	86	474.86	1.811	1.7	0.111
50	R	2	86.6	474.87	1.778	1.7	0.078
50	R	2	87.2	474.87	1.433	1.702	-0.269
50	R	2	87.8	474.88	1.538	1.705	-0.167
50	R	2	88.4	474.88	1.66	1.716	-0.056
50	R	2	89.1	474.89	1.807	1.719	0.088
50	R	2	89.7	474.9	1.684	1.72	-0.036
50	R	2	90.3	474.9	1.445	1.72	-0.275
50	R	2	90.9	474.91	1.76	1.718	0.042
50	R	2	91.5	474.92	1.827	1.724	0.103
50	R	2	92.1	474.92	1.891	1.734	0.157
50	R	2	92.7	474.93	1.696	1.743	-0.047
50	R	2	93.3	474.93	1.583	1.748	-0.165
50	R	2	93.9	474.94	1.755	1.75	0.005
50	R	2	94.5	474.95	1.743	1.75	-0.007
50	R	2	95.1	474.95	1.786	1.748	0.038
50	R	2	95.7	474.96	1.8	1.747	0.053
50	R	2	96.3	474.96	1.882	1.749	0.133
50	R	2	96.9	474.97	1.841	1.76	0.081
50	R	2	97.5	474.98	1.778	1.767	0.011
50	R	2	98.1	474.98	1.797	1.768	0.029
50	R	2	98.7	474.99	1.81	1.766	0.044
50	R	2	99.4	474.99	1.854	1.766	0.088
50	R	2	100	475	1.842	1.774	0.068
50	R	2	100.6	475.01	1.682	1.774	-0.092
50	R	2	101.2	475.01	1.714	1.772	-0.058
50	R	2	101.8	475.02	1.719	1.769	-0.05
50	R	2	102.4	475.02	1.698	1.775	-0.077
50	R	2	103	475.03	1.799	1.783	0.016
50	R	2	103.6	475.04	1.772	1.787	-0.015
50	R	2	104.2	475.04	1.781	1.786	-0.005
50	R	2	104.8	475.05	1.826	1.788	0.038
50	R	2	105.4	475.05	1.851	1.792	0.059
50	R	2	106	475.06	1.788	1.792	-0.004
50	R	2	106.6	475.07	1.758	1.792	-0.034
50	R	2	107.2	475.07	1.78	1.795	-0.015
50	R	2	107.8	475.08	1.852	1.788	0.064
50	R	2	108.4	475.08	1.809	1.784	0.025
50	R	2	109	475.09	1.791	1.781	0.01
50	R	2	109.6	475.1	1.664	1.78	-0.116
50	R	2	110.3	475.1	1.74	1.785	-0.045
50	R	2	110.9	475.11	1.705	1.787	-0.082
50	R	2	111.5	475.12	1.732	1.779	-0.047
50	R	2	112.1	475.12	1.739	1.777	-0.038
50	R	2	112.7	475.13	1.749	1.773	-0.024
50	R	2	113.3	475.13	1.803	1.771	0.032
50	R	2	113.9	475.14	1.886	1.773	0.113
50	R	2	114.5	475.15	1.896	1.773	0.123
50	R	2	115.1	475.15	1.878	1.775	0.103
50	R	2	115.7	475.16	1.697	1.777	-0.08
50	R	2	116.3	475.16	1.873	1.776	0.097
50	R	2	116.9	475.17	1.948	1.777	0.171
50	R	2	117.5	475.18	1.871	1.773	0.098
50	R	2	118.1	475.18	1.853	1.771	0.082
50	R	2	118.7	475.19	1.872	1.771	0.101
50	R	2	119.3	475.19	1.537	1.774	-0.237
50	R	2	119.9	475.2	1.669	1.777	-0.108
50	R	2	120.6	475.21	1.772	1.778	-0.006
50	R	2	121.2	475.21	1.805	1.778	0.027
50	R	2	121.8	475.22	1.862	1.775	0.087
50	R	2	122.4	475.22	1.758	1.77	-0.012
50	R	2	124.2	475.24	1.464	1.763	-0.299
50	R	2	124.8	475.25	1.618	1.758	-0.14
50	R	2	125.4	475.25	1.645	1.756	-0.111
50	R	2	126	475.26	1.728	1.756	-0.028
50	R	2	126.6	475.27	1.821	1.756	0.065
50	R	2	127.2	475.27	1.839	1.751	0.088
50	R	2	127.8	475.28	1.938	1.749	0.189
50	R	2	128.4	475.28	1.843	1.748	0.095
50	R	2	129	475.29	1.728	1.746	-0.018
50	R	2	129.6	475.3	1.803	1.745	0.058
50	R	2	130.2	475.3	1.71	1.746	-0.036
50	R	2	130.9	475.31	1.739	1.746	-0.007
50	R	2	131.5	475.32	1.811	1.746	0.065
50	R	2	132.1	475.32	1.766	1.745	0.021
50	R	2	132.7	475.33	1.827	1.74	0.087
50	R	2	133.3	475.33	1.752	1.741	0.011
50	R	2	133.9	475.34	1.728	1.749	-0.021
50	R	2	134.5	475.35	1.622	1.755	-0.133
50	R	2	135.1	475.35	1.587	1.761	-0.174
50	R	2	135.7	475.36	1.555	1.763	-0.208
50	R	2	136.3	475.36	1.712	1.767	-0.055
50	R	2	136.9	475.37	1.84	1.769	0.071
50	R	2	137.5	475.38	1.853	1.767	0.086
50	R	2	138.1	475.38	1.697	1.768	-0.071
50	R	2	138.7	475.39	1.709	1.771	-0.062
50	R	2	139.3	475.39	1.868	1.767	0.101
50	R	2	139.9	475.4	1.859	1.768	0.091
50	R	2	140.5	475.41	1.789	1.768	0.021
50	R	2	141.2	475.41	1.809	1.769	0.04
50	R	2	141.8	475.42	1.587	1.771	-0.184
50	R	2	143	475.43	1.666	1.772	-0.106
50	R	2	143.6	475.44	1.76	1.774	-0.014
50	R	2	144.2	475.44	1.766	1.778	-0.012
50	R	2	144.8	475.45	1.718	1.782	-0.064
50	R	2	145.4	475.45	1.786	1.779	0.007
50	R	2	146	475.46	1.753	1.779	-0.026
50	R	2	146.6	475.47	1.817	1.767	0.05
50	R	2	147.2	475.47	1.837	1.752	0.085
50	R	3	1.8	475.52	1.824	1.745	0.079
50	R	3	2.4	475.52	1.951	1.746	0.205
50	R	3	3	475.53	1.909	1.747	0.162
50	R	3	3.6	475.54	1.868	1.744	0.124
50	R	3	4.2	475.54	1.87	1.741	0.129
50	R	3	4.8	475.55	1.846	1.739	0.107
50	R	3	5.5	475.56	1.654	1.739	-0.085
50	R	3	6.1	475.56	1.762	1.744	0.018
50	R	3	6.7	475.57	1.721	1.746	-0.025
50	R	3	7.3	475.57	1.858	1.747	0.111
50	R	3	7.9	475.58	1.823	1.749	0.074
50	R	3	8.5	475.59	1.857	1.751	0.106
[truncated: 930 more rows]
